# Supplementary material for: Focused Examination of the Intestinal lamina Propria Yields Greater Molecular Insight into Mechanisms Underlying SIV Induced Immune Dysfunction
Source: PLoS One. 2012 Apr 12;7(4):e34561. doi: 10.1371/journal.pone.0034561 (PMC3325268; doi:10.1371/journal.pone.0034561)
Supplement: Table S1 — The full list of differentially expressed genes showing statistical significance at 21 days after SIV infection with their affymetrix IDs, gene and functional annotation. Tab 1: Up in 21d PI, Tab 2: Down in 21d PI, Tab 3: Up in 21d compared to 90d PI. (XLSX) [file pone.0034561.s002.xlsx]

## Sheet: Up 21d vs 0d PI
Probe	Fold Increase	P value
MmugDNA.17857.1.S1_at	1.70553	0.0183006
MmugDNA.31413.1.S1_x_at	1.70592	0.0282073
MmugDNA.42792.1.S1_at	1.71246	0.0307127
MmugDNA.9190.1.S1_at	1.71411	0.0340261
MmugDNA.27997.1.S1_at	1.71638	0.00593452
MmugDNA.17566.1.S1_at	1.71861	0.0384154
MmugDNA.25555.1.S1_at	1.71953	0.0320817
MmugDNA.8617.1.S1_at	1.72106	0.0315212
MmugDNA.3797.1.S1_at	1.72619	0.0284981
MmugDNA.17404.1.S1_s_at	1.72831	0.0187329
MmugDNA.2401.1.S1_s_at	1.72832	0.0392516
MmugDNA.37311.1.S1_at	1.7291	0.022673
MmugDNA.41794.1.S1_at	1.73026	0.00483747
MmugDNA.27619.1.S1_at	1.73362	0.0168714
MmugDNA.30660.1.S1_at	1.73525	0.0366435
MmugDNA.14022.1.S1_at	1.73656	0.0479828
MmugDNA.31493.1.S1_s_at	1.73702	0.00782673
MmugDNA.4120.1.S1_at	1.73981	0.0113749
MmugDNA.29796.1.S1_at	1.74321	0.0317344
MmugDNA.18292.1.S1_at	1.74622	0.0421276
MmugDNA.38211.1.S1_s_at	1.74623	0.0270393
MmuSTS.569.1.S1_at	1.74673	0.0299433
MmugDNA.19241.1.S1_at	1.74711	0.0489153
MmugDNA.33556.1.S1_at	1.74875	0.0148937
MmugDNA.15035.1.S1_at	1.75048	0.0430821
MmugDNA.35576.1.S1_at	1.75131	0.00955384
MmuSTS.3249.1.S1_at	1.75274	0.00260342
MmugDNA.30025.1.S1_at	1.7528	0.0034331
MmuSTS.2436.1.S1_at	1.75302	0.037306
MmugDNA.36765.1.S1_at	1.75362	0.0156271
MmugDNA.29950.1.S1_at	1.75852	0.00867006
MmugDNA.17562.1.S1_at	1.75937	0.0196071
MmugDNA.24320.1.S1_at	1.76136	0.028009
Mmu.2088.1.S1_at	1.76222	0.0232218
MmuSTS.698.1.S1_at	1.76409	0.0412168
MmugDNA.40686.1.S1_at	1.76414	0.0288646
MmuSTS.484.1.S1_s_at	1.76911	0.0257689
MmugDNA.1638.1.S1_at	1.77124	0.0493354
Mmu.11607.1.S1_at	1.77368	0.0234401
Mmu.9711.1.S1_at	1.77558	0.0397654
MmugDNA.28288.1.S1_at	1.77807	0.0252222
MmugDNA.23161.1.S1_at	1.77906	0.00764782
MmugDNA.24752.1.S1_at	1.78009	0.0142443
MmuSTS.2313.1.S1_at	1.78062	0.0403911
MmugDNA.26552.1.S1_at	1.78531	0.0351002
MmuSTS.1296.1.S1_at	1.78566	0.027639
MmugDNA.11816.1.S1_at	1.78919	0.0305587
MmugDNA.27260.1.S1_at	1.78951	0.0343681
MmugDNA.6643.1.S1_at	1.79337	0.0164226
MmugDNA.29499.1.S1_at	1.79828	0.000830917
MmugDNA.26225.1.S1_at	1.79849	0.0296993
MmugDNA.32411.1.S1_at	1.80065	0.040486
MmugDNA.2520.1.S1_at	1.80251	0.0208975
MmugDNA.17376.1.S1_at	1.80395	0.0180664
MmugDNA.41471.1.S1_at	1.80466	0.0290541
MmugDNA.4260.1.S1_at	1.81048	0.0159956
MmugDNA.28089.1.S1_s_at	1.81609	0.0185898
MmugDNA.37290.1.S1_at	1.81801	0.0446527
Mmu.4440.1.S1_at	1.82795	0.0424816
MmugDNA.7829.1.S1_at	1.83013	0.0129329
MmuSTS.3833.1.S1_at	1.83359	0.0160521
MmugDNA.16705.1.S1_s_at	1.83517	0.0357745
MmugDNA.31970.1.S1_at	1.83669	0.0230227
MmuSTS.912.1.S1_at	1.83912	0.00450335
MmuSTS.256.1.S1_at	1.83979	0.00897678
MmugDNA.18369.1.S1_at	1.84108	0.00701593
MmugDNA.37650.1.S1_at	1.84218	0.00788248
MmugDNA.11232.1.S1_at	1.84328	0.0449936
MmugDNA.17708.1.S1_at	1.84425	0.0127772
MmugDNA.37097.1.S1_at	1.84531	0.042422
MmugDNA.37792.1.S1_at	1.84558	0.0377682
MmugDNA.11393.1.S1_at	1.85468	0.0260379
MmugDNA.2702.1.S1_at	1.85477	0.0412451
MmugDNA.19855.1.S1_at	1.85494	0.00715572
MmugDNA.32918.1.S1_at	1.8554	0.0266451
MmuSTS.3739.1.S1_at	1.8555	0.0307541
MmugDNA.40059.1.S1_at	1.85882	0.010103
MmugDNA.22166.1.S1_s_at	1.85945	0.0185787
MmuSTS.3138.1.S1_at	1.86192	0.00427614
MmugDNA.40972.1.S1_at	1.8658	0.0370359
MmugDNA.13996.1.S1_at	1.86597	0.0307157
MmugDNA.2711.1.S1_at	1.87067	0.00445468
MmugDNA.14071.1.S1_at	1.87094	0.005089
MmugDNA.2143.1.S1_at	1.87104	0.0484618
MmugDNA.28978.1.S1_at	1.87305	0.0156959
MmuSTS.3468.1.S1_at	1.87391	0.013551
MmugDNA.37368.1.S1_at	1.87434	0.0480244
MmugDNA.21060.1.S1_at	1.87658	0.000540067
MmugDNA.32028.1.S1_at	1.87727	0.00572539
MmugDNA.4560.1.S1_at	1.87804	0.0380655
MmuSTS.667.1.S1_at	1.88283	0.0124286
MmugDNA.27917.1.S1_at	1.89608	0.0281815
MmugDNA.36817.1.S1_at	1.90101	0.0358757
MmugDNA.3963.1.S1_at	1.9029	0.0394139
MmunewRS.351.1.S1_at	1.90603	0.0461557
MmugDNA.22128.1.S1_at	1.90832	0.0312385
MmugDNA.14727.1.S1_at	1.91073	0.0327471
MmuSTS.4300.1.S1_at	1.9118	0.0188785
MmugDNA.24297.1.S1_at	1.91181	0.0213783
MmugDNA.11825.1.S1_at	1.91285	0.0482011
MmugDNA.450.1.S1_at	1.91363	0.0273251
MmugDNA.36722.1.S1_at	1.91689	0.00879322
MmunewRS.313.1.S1_at	1.91916	0.0372347
MmugDNA.34711.1.S1_at	1.92035	0.00304629
MmugDNA.42356.1.S1_at	1.92377	0.0444064
MmugDNA.8412.1.S1_at	1.92463	0.0162551
MmugDNA.28555.1.S1_at	1.92536	0.0466893
MmugDNA.6579.1.S1_at	1.92815	0.013138
MmugDNA.37227.1.S1_at	1.9284	0.0477933
MmugDNA.20076.1.S1_at	1.92926	0.00125374
MmugDNA.10958.1.S1_at	1.92936	0.000955583
MmugDNA.19776.1.S1_at	1.92961	0.0470591
MmugDNA.20595.1.S1_at	1.9403	0.0432564
MmugDNA.24977.1.S1_s_at	1.94725	0.0398704
MmugDNA.6276.1.S1_at	1.95097	0.0235691
MmugDNA.23353.1.S1_at	1.95277	0.0350609
MmugDNA.32661.1.S1_at	1.95315	0.0205773
MmugDNA.42987.1.S1_at	1.95364	0.0163108
MmuSTS.50.1.S1_at	1.96334	0.0287912
MmugDNA.23233.1.S1_at	1.96655	0.00841282
MmugDNA.40895.1.S1_at	1.97921	0.00327406
MmuSTS.1927.1.S1_at	1.98129	0.0459715
MmuSTS.478.1.S1_s_at	1.98186	0.0143642
MmugDNA.24682.1.S1_at	1.98556	0.0348019
MmugDNA.21699.1.S1_at	1.9859	0.0276218
MmugDNA.29782.1.S1_at	1.98656	0.0361868
MmugDNA.34432.1.S1_at	1.98756	0.039544
MmugDNA.7580.1.S1_at	1.98838	6.73313e-05
MmugDNA.42981.1.S1_at	1.9919	0.0413386
MmugDNA.38715.1.S1_at	1.99398	0.021188
MmugDNA.14250.1.S1_at	2.0044	0.0332503
MmuSTS.2728.1.S1_at	2.01089	0.0462577
MmugDNA.2936.1.S1_at	2.01147	0.040175
MmugDNA.42966.1.S1_at	2.01419	0.0212151
MmugDNA.5059.1.S1_at	2.01996	0.0393379
MmugDNA.37117.1.S1_at	2.02292	0.0308378
MmugDNA.26077.1.A1_at	2.02876	0.0443578
MmugDNA.25202.1.S1_at	2.02893	0.015932
MmugDNA.26520.1.S1_at	2.03688	0.00448214
MmugDNA.19433.1.S1_at	2.04077	0.0284494
MmugDNA.29292.1.S1_at	2.04108	0.0448918
MmugDNA.41692.1.S1_at	2.0411	0.0206481
MmugDNA.21076.1.S1_at	2.04222	0.0484602
MmuSTS.1716.1.S1_at	2.04252	0.0188663
MmuSTS.1889.1.S1_at	2.04736	0.0130495
MmugDNA.28030.1.S1_at	2.05314	0.0202802
MmugDNA.33391.1.S1_at	2.05319	0.0314169
MmuSTS.2787.1.S1_at	2.05722	0.00528634
MmugDNA.1603.1.S1_at	2.06041	0.0151538
MmugDNA.25676.1.S1_x_at	2.06365	0.00192731
MmugDNA.30721.1.S1_at	2.06368	0.0440801
MmugDNA.25385.1.S1_s_at	2.06373	0.0107023
MmugDNA.18326.1.S1_at	2.07481	0.0477917
MmugDNA.21634.1.S1_at	2.07589	0.0476574
MmugDNA.22637.1.S1_at	2.07745	0.039425
MmugDNA.34173.1.S1_at	2.08279	0.0221635
MmugDNA.1169.1.S1_at	2.09278	0.00601686
MmugDNA.31551.1.S1_at	2.09805	0.0115797
MmugDNA.28.1.S1_at	2.10245	0.0161032
MmugDNA.42414.1.S1_at	2.10984	0.00955108
MmugDNA.36379.1.S1_at	2.11082	0.0251638
MmuSTS.4406.1.S1_at	2.11631	0.0212487
MmugDNA.20192.1.S1_at	2.11719	0.00521369
MmugDNA.24805.1.S1_at	2.12376	0.0246201
MmugDNA.5060.1.S1_at	2.12546	0.0083368
MmugDNA.29567.1.S1_at	2.12598	0.022116
MmugDNA.23429.1.S1_at	2.12713	0.00539028
MmugDNA.25317.1.S1_at	2.12778	0.0394425
MmugDNA.25947.1.S1_at	2.12968	0.0431149
MmuSTS.3154.1.S1_s_at	2.13768	0.030966
MmugDNA.36681.1.S1_at	2.14997	0.0331293
Mmu.235.1.S1_at	2.15231	0.0459008
MmugDNA.15383.1.S1_at	2.15753	0.0376119
MmugDNA.39857.1.S1_at	2.16023	0.049349
MmugDNA.22240.1.S1_at	2.16159	0.0428081
MmugDNA.11269.1.S1_at	2.16331	0.0477431
MmugDNA.10267.1.S1_at	2.17089	0.0310478
MmugDNA.36295.1.S1_at	2.17267	0.0362097
MmugDNA.34435.1.S1_at	2.17398	0.0149797
MmugDNA.38408.1.S1_at	2.17407	0.0409856
MmugDNA.146.1.S1_at	2.17466	0.0179291
MmunewRS.198.1.S1_at	2.17819	0.0247973
MmugDNA.18380.1.S1_at	2.17822	0.0398933
MmugDNA.6028.1.S1_at	2.18428	0.0347734
MmugDNA.43557.1.S1_s_at	2.18482	0.00259823
MmugDNA.32267.1.S1_at	2.18805	0.0361699
MmuSTS.4160.1.S1_at	2.18974	0.00964
MmugDNA.41638.1.S1_at	2.19311	0.0133401
MmugDNA.24380.1.S1_at	2.20161	0.0174726
MmugDNA.22369.1.S1_at	2.21009	0.00114712
MmuSTS.2225.1.S1_at	2.21517	0.0179504
MmuSTS.1371.1.S1_at	2.21983	0.025201
MmugDNA.9379.1.S1_at	2.22671	0.0162171
MmugDNA.8846.1.S1_at	2.22795	0.0183314
Mmu.13335.1.S1_at	2.22848	0.0159304
MmugDNA.16661.1.S1_at	2.22924	0.0379816
MmugDNA.27959.1.S1_at	2.23403	0.0287042
MmuSTS.3760.1.S1_at	2.23403	0.0366948
MmugDNA.41151.1.S1_at	2.24865	0.0136829
MmugDNA.43441.1.S1_at	2.24934	0.0359528
MmugDNA.36381.1.S1_at	2.25421	0.0446946
MmugDNA.43434.1.S1_at	2.25497	0.00626216
MmugDNA.34153.1.S1_at	2.26367	0.00152226
MmugDNA.10306.1.S1_at	2.27178	0.0445639
MmugDNA.20462.1.S1_at	2.27845	0.0108235
MmugDNA.34935.1.S1_at	2.28156	0.0274961
MmuSTS.2957.1.S1_at	2.2824	0.032125
MmugDNA.16518.1.S1_at	2.29283	0.0273565
MmugDNA.34660.1.S1_at	2.30047	0.00916481
MmunewRS.347.1.S1_at	2.30774	0.0325668
MmuSTS.1055.1.S1_at	2.31298	0.0145768
MmugDNA.15722.1.S1_at	2.31774	0.0238188
Mmu.3176.1.S1_at	2.32306	0.0398666
MmugDNA.42006.1.S1_at	2.32369	0.0425227
MmugDNA.1349.1.S1_at	2.32554	0.0209098
MmugDNA.3760.1.S1_at	2.33037	0.0338327
MmugDNA.34758.1.S1_at	2.34178	0.0202506
MmugDNA.8901.1.S1_at	2.34549	0.0477347
Mmu.7649.1.S1_at	2.34601	0.0285356
MmugDNA.10727.1.S1_at	2.34754	0.00811051
MmuSTS.3914.1.S1_at	2.35015	0.0403265
MmugDNA.26785.1.S1_at	2.35175	0.0413557
MmuSTS.2273.1.S1_at	2.35286	0.0126793
MmugDNA.10233.1.S1_s_at	2.36637	0.0486807
MmugDNA.13639.1.S1_at	2.37212	0.0422328
MmuSTS.2571.1.S1_at	2.37272	0.017684
Mmu.9961.1.S1_at	2.37631	0.0417714
MmugDNA.28497.1.S1_at	2.37703	0.0146594
MmugDNA.9022.1.S1_at	2.37839	0.0209067
MmugDNA.21551.1.S1_at	2.38018	0.035978
MmugDNA.30754.1.S1_at	2.38773	0.0406429
MmugDNA.12640.1.S1_at	2.38946	0.0206113
MmugDNA.31325.1.S1_at	2.39026	0.0426329
MmuSTS.2749.1.S1_at	2.3914	0.0190485
MmugDNA.23915.1.S1_at	2.3933	0.0271431
MmugDNA.11157.1.S1_at	2.39707	0.0284238
Mmu.11367.1.S1_at	2.39947	0.0254073
MmugDNA.16467.1.S1_at	2.41082	0.0499623
MmugDNA.19563.1.S1_at	2.42497	0.03024
MmugDNA.42698.1.S1_at	2.42623	0.0281099
MmugDNA.40315.1.S1_at	2.43115	0.0141058
MmugDNA.12929.1.S1_at	2.43183	0.0106104
MmugDNA.37573.1.S1_at	2.43848	0.0199785
Mmu.1477.1.S1_at	2.4495	0.035341
MmugDNA.15369.1.S1_at	2.4534	0.0325379
MmugDNA.19247.1.S1_at	2.46717	0.00139336
MmugDNA.20025.1.S1_at	2.46857	0.0150596
MmugDNA.20219.1.S1_at	2.46956	0.0495468
MmuSTS.2034.1.S1_at	2.48157	0.00649911
MmugDNA.36212.1.S1_at	2.48314	0.0109116
MmugDNA.1242.1.S1_at	2.48908	0.0182966
MmugDNA.28919.1.A1_at	2.49088	0.0304388
MmugDNA.17524.1.S1_at	2.49491	0.0426838
MmugDNA.20831.1.S1_at	2.50822	0.00833644
MmugDNA.1968.1.S1_s_at	2.50959	0.0156469
MmugDNA.2471.1.S1_at	2.51693	0.0289091
MmugDNA.24849.1.S1_at	2.51894	0.0037721
MmugDNA.34050.1.S1_s_at	2.52303	0.0480167
MmugDNA.1051.1.S1_at	2.52332	0.0163774
MmugDNA.23.1.S1_at	2.52569	0.0498995
MmugDNA.28661.1.S1_at	2.53352	0.00250268
MmuSTS.659.1.S1_at	2.54032	0.029801
MmugDNA.26598.1.S1_at	2.5546	0.0413556
MmugDNA.31804.1.S1_at	2.56113	0.0405444
MmugDNA.34262.1.S1_at	2.56136	0.00173112
MmugDNA.21824.1.S1_at	2.56473	0.0137716
MmugDNA.560.1.S1_at	2.5656	0.0208175
MmugDNA.2548.1.S1_at	2.57049	0.00484998
MmugDNA.23972.1.S1_at	2.57432	0.023812
MmugDNA.29140.1.S1_s_at	2.58849	0.0373162
MmugDNA.38008.1.S1_at	2.59003	0.0225994
MmugDNA.6392.1.S1_at	2.59274	0.0287984
MmuSTS.1459.1.S1_at	2.59613	0.0139596
Mmu.512.1.S1_at	2.59729	0.0231372
MmugDNA.30040.1.S1_at	2.59841	0.0120452
MmugDNA.16612.1.S1_at	2.61449	0.0304142
MmugDNA.18298.1.S1_at	2.61581	0.00838729
MmugDNA.5531.1.S1_at	2.62029	0.0156491
MmugDNA.38910.1.S1_at	2.62657	0.0469365
MmugDNA.29358.1.S1_at	2.63356	0.0205687
MmugDNA.20747.1.S1_at	2.63947	0.0445827
MmuSTS.103.1.S1_at	2.64681	0.0283306
Mmu.7507.2.S1_at	2.68858	0.0495068
MmugDNA.13194.1.S1_s_at	2.68995	0.0231009
MmugDNA.14359.1.S1_at	2.69056	0.0291209
Mmu.12873.1.S1_at	2.69383	0.0343424
MmugDNA.12299.1.S1_at	2.69464	0.00851948
MmugDNA.1072.1.S1_at	2.70065	0.0458369
MmugDNA.12801.1.S1_at	2.73243	0.0182771
MmugDNA.2294.1.S1_at	2.75224	0.00370638
MmugDNA.38728.1.S1_at	2.75781	0.0219822
MmugDNA.15714.1.S1_at	2.75834	0.00144053
Mmu.3820.1.S1_at	2.78275	0.00822663
MmugDNA.39885.1.S1_at	2.78573	0.0383789
MmugDNA.35565.1.S1_at	2.78752	0.00587338
MmugDNA.40732.1.S1_at	2.79765	0.0192154
MmugDNA.15396.1.S1_at	2.79785	0.0136994
MmunewRS.910.1.S1_at	2.79962	0.00265541
AY588945.CDS3.S1_s_at	2.80128	0.0179487
MmugDNA.38153.1.S1_at	2.80534	0.0201262
MmugDNA.22909.1.S1_at	2.81475	0.0179809
MmugDNA.41226.1.S1_at	2.81573	0.00352102
MmugDNA.22944.1.S1_at	2.82787	0.0316784
MmugDNA.16700.1.S1_s_at	2.8281	0.0295833
Mmu.13511.1.S1_at	2.86065	0.00675765
MmugDNA.19700.1.S1_at	2.86324	0.0480876
MmugDNA.10864.1.S1_at	2.8644	0.00172141
MmugDNA.1613.1.S1_at	2.8741	0.0204765
MmugDNA.19879.1.S1_at	2.87454	0.0461467
MmugDNA.40154.1.S1_at	2.89692	0.0359535
MmugDNA.23972.1.S1_s_at	2.89863	0.0085632
MmugDNA.8486.1.S1_at	2.90336	0.00137689
MmugDNA.35384.1.S1_at	2.90895	0.0172809
MmugDNA.18205.1.S1_at	2.91065	0.0164981
MmugDNA.39396.1.S1_at	2.91848	0.0109063
MmugDNA.29867.1.S1_at	2.92087	0.0156258
MmugDNA.12751.1.S1_at	2.93814	0.00846649
Mmu.2392.1.S1_at	2.94523	0.0319657
MmugDNA.17118.1.S1_at	2.94717	0.0290448
MmuSTS.1939.1.S1_at	2.95703	0.048228
MmugDNA.7419.1.S1_at	2.96632	0.0433726
MmugDNA.11327.1.S1_s_at	2.97619	0.0227184
MmugDNA.37469.1.S1_x_at	2.99968	0.0285653
MmugDNA.1698.1.S1_at	3.01191	0.0107437
MmugDNA.19594.1.S1_at	3.01319	0.0232622
MmugDNA.42353.1.S1_at	3.01781	0.00205267
MmugDNA.2990.1.S1_at	3.05105	0.022344
MmugDNA.27182.1.S1_at	3.0684	0.0122686
MmugDNA.35276.1.S1_at	3.07414	0.0150658
MmugDNA.34489.1.S1_at	3.09578	0.00393836
MmugDNA.52.1.S1_at	3.10693	0.0157125
MmugDNA.40834.1.S1_at	3.11144	0.043573
Mmu.10088.2.S1_at	3.12552	0.0121293
MmugDNA.40223.1.S1_at	3.13806	0.0104285
MmugDNA.34068.1.S1_at	3.13979	0.0416104
MmugDNA.33881.1.S1_at	3.1527	0.0344175
MmugDNA.12231.1.S1_at	3.15962	0.0210704
MmugDNA.41654.1.S1_at	3.17458	0.0245661
MmugDNA.27813.1.S1_at	3.21883	0.00122242
MmugDNA.29553.1.S1_at	3.22839	0.0201192
MmuSTS.917.1.S1_at	3.24152	0.00525778
MmugDNA.22693.1.S1_at	3.25804	0.0279086
MmugDNA.41928.1.S1_at	3.2608	0.0323934
MmugDNA.23249.1.S1_at	3.26178	0.0280094
MmugDNA.20450.1.S1_at	3.27304	0.0494833
MmugDNA.19009.1.S1_at	3.29957	0.0362599
MmugDNA.10775.1.S1_s_at	3.31075	0.0419717
MmugDNA.17136.1.S1_at	3.31227	0.0445385
MmugDNA.40879.1.S1_at	3.33226	0.0135777
MmuSTS.3967.1.S1_at	3.34284	0.0404182
MmugDNA.4159.1.S1_at	3.34327	0.0417933
Mmu.2196.1.S1_at	3.34407	0.0373235
Mmu.10484.1.S1_at	3.35356	0.0096453
MmugDNA.7550.1.S1_at	3.38141	0.0334279
MmugDNA.15430.1.S1_at	3.3916	0.0350185
MmugDNA.14617.1.S1_s_at	3.39751	0.0203909
MmugDNA.26244.1.S1_at	3.4212	0.0463289
MmugDNA.15572.1.S1_at	3.43154	0.0394095
MmugDNA.43183.1.S1_at	3.44442	0.0127909
MmugDNA.26931.1.S1_at	3.45397	0.0144271
Mmu.15331.1.S1_at	3.47309	0.0231565
MmugDNA.9361.1.S1_at	3.4743	0.0260305
MmugDNA.15137.1.S1_at	3.49066	0.0449663
MmugDNA.11492.1.S1_at	3.5043	0.0301819
MmugDNA.41271.1.S1_at	3.55138	0.0275157
MmugDNA.2453.1.S1_at	3.55671	0.0194331
MmugDNA.40971.1.S1_at	3.55808	0.0139947
MmugDNA.31224.1.S1_at	3.61629	0.0163045
MmugDNA.39199.1.S1_at	3.64706	0.0148687
Mmu.2174.1.S1_at	3.67397	0.0354457
MmugDNA.36447.1.S1_at	3.68124	0.031977
MmugDNA.5068.1.S1_at	3.69484	0.0352505
MmugDNA.33038.1.S1_at	3.72314	0.0461709
MmuSTS.3418.1.S1_at	3.74793	0.0143453
MmugDNA.22828.1.S1_at	3.79568	0.00233385
MmugDNA.38189.1.S1_at	3.85116	0.0183981
MmugDNA.13990.1.S1_at	3.90368	0.000478267
MmugDNA.27391.1.S1_at	3.91295	0.00567948
MmugDNA.11969.1.S1_at	3.96927	0.00247833
MmugDNA.15325.1.S1_at	3.98366	0.0494716
MmugDNA.30068.1.S1_at	3.99945	0.000455098
Mmu.3463.1.S1_at	4.00583	0.0411317
MmugDNA.18910.1.S1_at	4.05137	0.0381388
MmugDNA.42089.1.S1_at	4.07005	0.0452272
MmugDNA.21025.1.S1_at	4.08394	0.020121
MmugDNA.19981.1.S1_at	4.11895	0.00383818
Mmu.3265.1.S1_s_at	4.14476	0.0356124
MmugDNA.41278.1.S1_at	4.15611	0.0229498
MmugDNA.20872.1.S1_at	4.18234	0.00989766
MmugDNA.6804.1.S1_at	4.18983	0.0330417
MmugDNA.15401.1.S1_at	4.33393	0.0109621
Mmu.3058.1.S1_at	4.3424	0.0360285
MmugDNA.42111.1.S1_at	4.34961	0.0478921
MmugDNA.75.1.S1_x_at	4.51925	0.0390394
MmugDNA.22917.1.S1_at	4.60194	0.00604911
MmugDNA.10534.1.S1_at	4.94925	0.0315782
MmugDNA.20862.1.S1_s_at	5.20434	0.00944233
Mmu.16215.1.S1_at	5.23511	0.0477301
MmugDNA.6336.1.S1_at	5.29092	0.0146763
MmugDNA.19502.1.S1_at	5.51747	0.0198782
MmugDNA.33680.1.S1_at	5.71327	0.0235459
MmugDNA.39902.1.S1_at	5.72795	0.00137875
MmugDNA.10775.1.S1_at	5.73306	0.010641
Mmu.1605.1.S1_at	5.78359	0.0461944
MmugDNA.5748.1.S1_at	6.02829	0.0136844
MmuSTS.3687.1.S1_at	7.25634	0.0482444
MmugDNA.22574.1.S1_at	7.41382	0.0395235
MmugDNA.2406.1.S1_at	7.67643	0.00514103
Mmu.6763.1.S1_at	7.77375	5.02277e-05

## Sheet: Down 21d vs 0d PI
Probe	Fold Decrease	P value
MmugDNA.3467.1.S1_s_at	1.70079	0.034077
MmugDNA.9999.1.S1_at	1.70088	0.00420363
MmuSTS.1053.1.S1_at	1.70135	0.0270955
MmugDNA.39545.1.S1_at	1.70212	0.0129806
MmugDNA.12593.1.S1_at	1.70234	0.031079
MmugDNA.12528.1.S1_at	1.70237	0.0220271
MmugDNA.1257.1.S1_at	1.70252	0.0422318
MmugDNA.43136.1.S1_at	1.70278	0.04464
MmugDNA.6614.1.S1_at	1.70296	0.0360704
MmugDNA.22126.1.S1_at	1.70318	0.0204779
MmugDNA.25674.1.S1_at	1.70332	0.0230255
MmugDNA.135.1.S1_at	1.70401	0.0140654
Mmu.6412.1.S1_at	1.70491	0.0152278
MmugDNA.19881.1.S1_at	1.70503	0.00272535
MmugDNA.37746.1.S1_at	1.70549	0.0419942
MmuSTS.4621.1.S1_at	1.70641	0.00577011
MmugDNA.11550.1.S1_at	1.70652	0.0279736
MmugDNA.21877.1.S1_at	1.7066	0.0023177
MmugDNA.25530.1.S1_at	1.70666	0.0457499
MmugDNA.4402.1.S1_at	1.70938	0.0222729
MmugDNA.34057.1.S1_at	1.70953	0.0431987
MmugDNA.10610.1.S1_s_at	1.70981	0.0490141
MmugDNA.13417.1.S1_at	1.71101	0.045643
MmugDNA.39424.1.S1_at	1.71163	0.0400628
MmugDNA.21062.1.S1_at	1.71267	0.00271268
MmugDNA.32608.1.S1_at	1.71334	0.0185767
MmugDNA.5557.1.S1_at	1.71336	0.0416552
MmugDNA.12229.1.S1_at	1.71351	0.0447197
MmugDNA.24578.1.S1_at	1.71365	0.0156959
MmuSTS.954.1.S1_at	1.71375	0.0146333
MmugDNA.3183.1.S1_at	1.71405	0.0294362
MmugDNA.28352.1.S1_s_at	1.71438	0.0287995
MmuSTS.3287.1.S1_at	1.71485	0.0241655
MmugDNA.17533.1.S1_at	1.71534	0.0035899
MmugDNA.29721.1.S1_at	1.71607	0.0342042
MmugDNA.41783.1.S1_at	1.71643	0.0465241
MmugDNA.4537.1.S1_at	1.71689	0.01839
MmugDNA.3713.1.S1_at	1.71796	0.0336359
MmugDNA.17851.1.S1_at	1.71855	0.0413741
MmugDNA.16042.1.S1_at	1.71928	0.0211034
MmugDNA.22804.1.S1_at	1.72204	0.0496199
MmuSTS.2242.1.S1_at	1.72229	0.0309516
MmugDNA.6891.1.S1_s_at	1.72247	0.0456542
MmugDNA.34380.1.S1_at	1.72265	0.0165097
MmugDNA.38812.1.S1_at	1.72269	0.0413982
MmugDNA.10805.1.S1_s_at	1.72341	0.0431581
MmuSTS.4184.1.S1_at	1.72375	0.0488614
MmugDNA.32377.1.S1_at	1.7241	0.0040573
MmugDNA.30032.1.S1_at	1.72481	0.0269592
MmugDNA.40379.1.S1_at	1.72643	0.0423579
MmugDNA.16070.1.S1_at	1.72687	0.0360928
MmugDNA.30928.1.S1_at	1.72711	0.0336375
MmugDNA.33179.1.S1_s_at	1.72756	0.0414597
MmugDNA.23781.1.S1_s_at	1.72763	0.000494502
MmugDNA.43385.1.S1_at	1.73297	0.0403933
MmuSTS.3972.1.S1_at	1.73408	0.0426023
MmugDNA.31314.1.S1_at	1.73578	0.0402843
MmugDNA.37956.1.S1_at	1.73599	0.0327928
MmuSTS.3081.1.S1_at	1.73811	0.0016536
MmugDNA.893.1.S1_at	1.7387	0.0158562
MmugDNA.35213.1.S1_at	1.73952	0.0110089
MmuSTS.1496.1.S1_at	1.74035	0.0478168
MmuSTS.4041.1.S1_at	1.74127	0.0269876
MmugDNA.11546.1.S1_at	1.74163	0.0313399
MmugDNA.6910.1.S1_at	1.74164	0.0358916
MmugDNA.3937.1.S1_at	1.74231	0.0121472
MmuSTS.3952.1.S1_at	1.74253	0.0183752
MmugDNA.6316.1.S1_at	1.74303	0.0495991
MmugDNA.29100.1.S1_at	1.7434	0.0140799
MmunewRS.756.1.S1_at	1.74546	0.028222
MmugDNA.25400.1.S1_s_at	1.7459	0.0363684
MmugDNA.879.1.S1_at	1.74602	0.00988385
MmugDNA.31400.1.S1_at	1.74635	0.0174576
MmugDNA.14113.1.S1_at	1.74703	0.0158366
Mmu.7758.1.S1_at	1.74706	0.0364626
MmugDNA.19046.1.S1_at	1.74814	0.035424
MmugDNA.18366.1.S1_at	1.74817	0.0367511
MmugDNA.29996.1.S1_at	1.74832	0.0410386
MmugDNA.23086.1.S1_at	1.7497	0.0164122
MmugDNA.5120.1.S1_at	1.75004	0.0282278
MmugDNA.32508.1.S1_at	1.75027	0.0401613
MmunewRS.469.1.S1_at	1.75029	0.0146199
MmuSTS.2544.1.S1_at	1.75103	0.0384577
MmugDNA.25684.1.S1_at	1.75116	0.0394067
MmunewRS.956.1.S1_at	1.75157	0.0327472
MmugDNA.16722.1.S1_at	1.75165	0.0373073
MmugDNA.32095.1.S1_at	1.75264	0.0330757
MmugDNA.43259.1.S1_at	1.75427	0.0340719
MmugDNA.17001.1.S1_at	1.75434	0.0474514
MmugDNA.34610.1.S1_at	1.75441	0.0497288
MmugDNA.2586.1.S1_at	1.75461	0.00545934
MmugDNA.43384.1.S1_at	1.75613	0.0495588
MmugDNA.12276.1.S1_at	1.757	0.0230936
MmugDNA.13548.1.S1_at	1.75936	0.0445959
MmugDNA.36540.1.S1_at	1.76165	0.0265083
MmugDNA.30009.1.S1_s_at	1.76229	0.0425911
MmugDNA.42431.1.S1_at	1.7636	0.0299678
MmugDNA.27407.1.S1_at	1.7637	0.0119343
MmugDNA.1167.1.S1_at	1.76425	0.00854292
MmugDNA.36251.1.S1_at	1.765	0.0115294
MmugDNA.12323.1.S1_at	1.76509	0.00292136
Mmu.10187.1.S1_at	1.76535	0.00784288
MmugDNA.2679.1.S1_at	1.76646	0.043884
MmugDNA.42461.1.S1_at	1.76921	0.0395577
MmugDNA.32393.1.S1_at	1.76969	0.0224158
MmugDNA.33530.1.S1_at	1.76978	0.0423103
MmugDNA.38706.1.S1_s_at	1.77029	0.00845061
MmugDNA.7185.1.S1_at	1.77036	0.0436014
MmugDNA.21519.1.S1_at	1.77049	0.0117278
MmugDNA.34608.1.S1_at	1.77159	0.0227535
MmugDNA.38489.1.S1_at	1.7726	0.000652781
MmugDNA.30525.1.S1_at	1.77456	0.042601
MmuSTS.962.1.S1_at	1.77489	0.0483081
MmugDNA.4538.1.S1_at	1.7749	0.0282623
MmugDNA.1109.1.S1_at	1.77522	0.0425076
MmugDNA.460.1.S1_at	1.77535	0.00710656
MmugDNA.40096.1.S1_at	1.77563	0.0112346
MmuSTS.2756.1.S1_s_at	1.77689	0.0316181
MmugDNA.12416.1.S1_at	1.77845	0.0430825
MmugDNA.26914.1.S1_at	1.77921	0.0264797
MmugDNA.8653.1.S1_at	1.78003	0.0235782
MmugDNA.16449.1.S1_at	1.78031	0.0209543
MmugDNA.11767.1.S1_at	1.78127	0.0496678
MmuSTS.4728.1.S1_at	1.78293	0.00567969
MmugDNA.26902.1.S1_s_at	1.78329	0.0456599
MmuSTS.3695.1.S1_s_at	1.78483	0.0454598
MmugDNA.34607.1.S1_at	1.78508	0.0446744
MmugDNA.4269.1.S1_at	1.78531	0.024349
MmugDNA.29711.1.S1_at	1.78557	0.00234085
MmuSTS.3112.1.S1_at	1.78771	0.012018
MmugDNA.37762.1.S1_at	1.79154	0.0306735
MmugDNA.2928.1.S1_at	1.79226	0.0209539
MmugDNA.16496.1.S1_at	1.7939	0.0132057
MmugDNA.20355.1.S1_at	1.79525	0.00472251
MmugDNA.12281.1.S1_x_at	1.79766	0.0422262
MmuSTS.3978.1.S1_at	1.79813	0.0337206
MmugDNA.17832.1.S1_at	1.79898	0.0407288
Mmu.3395.1.S1_s_at	1.80095	0.0366691
MmugDNA.17619.1.S1_at	1.80199	0.00897859
MmugDNA.797.1.S1_at	1.80261	0.0361942
MmuSTS.4112.1.S1_at	1.80269	0.00810613
MmugDNA.36086.1.S1_at	1.80292	0.041363
Mmu.16255.1.S1_at	1.80386	0.00222997
MmugDNA.11934.1.S1_at	1.80398	0.0346685
MmugDNA.32040.1.S1_at	1.80408	0.0482128
MmugDNA.37448.1.S1_at	1.80441	0.00971979
MmugDNA.1840.1.S1_at	1.80459	0.0144456
MmugDNA.21414.1.S1_at	1.80587	0.010669
MmugDNA.17657.1.S1_at	1.80635	0.0246001
MmugDNA.39378.1.S1_at	1.8069	0.000233984
MmuSTS.2645.1.S1_at	1.8072	0.0147464
MmugDNA.11528.1.S1_at	1.80774	0.0129483
MmugDNA.6188.1.S1_at	1.80886	0.0261793
MmugDNA.40663.1.S1_at	1.80901	0.00580817
MmugDNA.33125.1.S1_at	1.80924	0.0374235
MmugDNA.23739.1.S1_at	1.80931	0.0420662
MmugDNA.36680.1.S1_s_at	1.80989	0.010397
MmugDNA.32897.1.S1_at	1.81009	0.0443381
MmugDNA.13258.1.S1_at	1.81033	0.00282707
MmuSTS.2378.1.S1_at	1.81087	0.0120618
MmuSTS.2203.1.S1_at	1.81396	0.0239557
MmugDNA.23392.1.S1_at	1.81402	0.0190274
MmugDNA.38377.1.S1_s_at	1.81564	0.0337949
MmugDNA.34326.1.S1_at	1.81591	0.0174301
MmugDNA.41097.1.S1_at	1.81611	0.0174772
MmugDNA.28931.1.S1_at	1.8163	0.0469682
MmugDNA.1134.1.S1_at	1.81819	0.0394206
MmugDNA.14905.1.S1_at	1.81849	0.0483637
MmugDNA.33184.1.S1_at	1.81921	0.00106863
MmugDNA.31468.1.S1_at	1.8206	0.029819
MmugDNA.37513.1.S1_at	1.82097	0.0269372
MmugDNA.18613.1.S1_at	1.8252	0.0408688
MmugDNA.25986.1.S1_at	1.82619	0.0102466
MmugDNA.41268.1.S1_at	1.82683	0.0401196
MmugDNA.6865.1.S1_at	1.82737	0.0320221
MmuSTS.4630.1.S1_at	1.82776	0.0116627
Mmu.15852.1.S1_s_at	1.83021	0.0394956
MmugDNA.19309.1.S1_at	1.83126	0.00978908
MmugDNA.30405.1.S1_at	1.83354	0.0434807
MmugDNA.43588.1.S1_at	1.83414	0.041837
MmugDNA.25437.1.S1_at	1.83462	0.0301745
Mmu.12959.1.S1_at	1.83464	0.0100618
MmugDNA.12777.1.S1_at	1.83512	0.00883081
MmugDNA.32307.1.S1_at	1.83539	0.0492053
MmugDNA.2605.1.S1_at	1.8356	0.0161575
MmugDNA.14304.1.S1_x_at	1.83588	0.0398295
MmugDNA.7345.1.S1_at	1.83604	0.0349322
MmugDNA.12653.1.S1_s_at	1.83682	0.0298143
MmugDNA.22495.1.S1_at	1.8374	0.0173202
MmugDNA.4849.1.S1_at	1.83811	0.038312
MmugDNA.40405.1.S1_at	1.83883	0.0236217
MmugDNA.1949.1.S1_at	1.83996	0.0466453
MmugDNA.43476.1.S1_at	1.84069	0.00897244
MmugDNA.37995.1.S1_at	1.84073	0.0331104
MmugDNA.10790.1.S1_at	1.84131	0.00825596
MmugDNA.26673.1.S1_at	1.84153	0.0334956
MmugDNA.27382.1.S1_at	1.84182	0.0208262
MmugDNA.32907.1.S1_at	1.84202	0.0406089
Mmu.9324.1.S1_at	1.84227	0.019846
MmugDNA.18635.1.S1_at	1.84397	0.0253394
MmugDNA.8734.1.S1_s_at	1.8444	0.021654
MmugDNA.26970.1.S1_x_at	1.84543	0.012281
MmugDNA.5705.1.S1_at	1.84608	0.014969
MmugDNA.9810.1.S1_s_at	1.84744	0.0344482
MmugDNA.23962.1.S1_at	1.84836	0.0340582
MmugDNA.23003.1.S1_s_at	1.84868	0.0152272
MmuSTS.359.1.S1_at	1.84882	0.012534
MmugDNA.30860.1.S1_s_at	1.84941	0.0342039
MmuSTS.2334.1.S1_at	1.84947	0.0341072
MmugDNA.25939.1.S1_s_at	1.85063	0.00765696
MmugDNA.41334.1.S1_at	1.8514	0.0420232
MmugDNA.17203.1.S1_at	1.85221	0.0387216
MmugDNA.36986.1.S1_at	1.85266	0.00630172
MmugDNA.15620.1.S1_at	1.85281	0.00593928
MmugDNA.18438.1.S1_at	1.85292	0.0301815
MmugDNA.27363.1.S1_at	1.85295	0.0229555
MmugDNA.40224.1.S1_at	1.85396	0.047576
MmugDNA.18964.1.S1_at	1.85422	0.0291218
MmuSTS.1526.1.S1_at	1.85704	0.0222547
MmugDNA.40771.1.S1_at	1.8572	0.0379505
MmugDNA.10571.1.S1_at	1.85744	0.028873
MmugDNA.39306.1.S1_at	1.8601	0.0107545
MmugDNA.29578.1.S1_at	1.86023	0.0488717
MmugDNA.23115.1.S1_at	1.86134	0.0470692
MmugDNA.21535.1.S1_at	1.86188	0.00541555
MmugDNA.4402.1.S1_s_at	1.86199	0.0462797
Mmu.16551.1.S1_at	1.86222	0.0100579
MmugDNA.42525.1.S1_at	1.86338	0.00192819
MmugDNA.22364.1.S1_at	1.86385	0.0419083
MmugDNA.41051.1.S1_at	1.86485	0.0297716
MmuSTS.288.1.S1_at	1.86544	0.0296177
MmugDNA.11455.1.S1_s_at	1.86611	0.049313
MmuSTS.3970.1.S1_at	1.86679	0.00411348
MmugDNA.8266.1.S1_at	1.86685	0.017325
Mmu.8980.1.S1_s_at	1.86736	0.0464249
MmugDNA.22554.1.S1_at	1.86756	0.0207381
MmuSTS.1336.1.S1_at	1.86785	0.00731716
MmugDNA.23124.1.S1_at	1.869	0.0187394
MmugDNA.30937.1.S1_at	1.86922	0.0392775
MmugDNA.42695.1.S1_at	1.8697	0.0299876
MmugDNA.406.1.S1_s_at	1.87058	0.0186092
MmugDNA.29813.1.S1_at	1.87138	0.0230255
MmugDNA.41811.1.S1_at	1.87455	0.0103209
MmugDNA.15501.1.S1_at	1.87495	0.0193941
MmugDNA.11311.1.S1_at	1.87498	0.0391993
MmugDNA.13776.1.S1_s_at	1.87739	0.0424361
MmuSTS.4125.1.S1_at	1.87782	0.0243012
MmugDNA.14149.1.S1_at	1.87808	0.0253669
MmugDNA.12604.1.S1_at	1.87828	0.017768
MmugDNA.6313.1.S1_at	1.87898	0.0453341
MmugDNA.912.1.S1_at	1.88097	0.0478588
MmugDNA.11985.1.S1_at	1.88119	0.0337801
MmugDNA.41299.1.S1_at	1.88176	0.00293729
MmuSTS.4616.1.S1_at	1.8818	0.00831592
Mmu.8122.1.A1_at	1.88197	0.0336104
MmugDNA.39939.1.S1_at	1.88236	0.0268151
MmugDNA.9180.1.S1_at	1.88255	0.0193597
MmunewRS.64.1.S1_at	1.88259	0.0130838
MmugDNA.29101.1.S1_at	1.88349	0.00453719
MmugDNA.25850.1.S1_at	1.88379	0.0396944
MmugDNA.27766.1.S1_at	1.88457	0.0284814
MmugDNA.42591.1.S1_at	1.88808	0.0494163
MmugDNA.22149.1.S1_at	1.88815	0.0401261
MmugDNA.7612.1.S1_at	1.8899	0.00114544
MmuSTS.1415.1.S1_at	1.89002	0.0471087
MmugDNA.29958.1.S1_s_at	1.89145	0.00824519
MmugDNA.32043.1.S1_at	1.89235	0.0421502
MmugDNA.10318.1.S1_at	1.89289	0.0443154
MmugDNA.520.1.S1_at	1.8933	0.0157178
MmugDNA.35458.1.S1_at	1.89555	0.0101724
Mmu.12059.1.S1_at	1.89732	0.0301763
MmuSTS.4553.1.S1_at	1.89754	0.0207951
MmugDNA.28215.1.S1_at	1.89867	0.004939
MmugDNA.30967.1.S1_at	1.90198	0.0302684
MmugDNA.27524.1.S1_at	1.90283	0.0385489
MmugDNA.36668.1.S1_at	1.90469	0.0324401
MmugDNA.11535.1.S1_at	1.90498	0.0382587
MmugDNA.37034.1.S1_at	1.90502	0.0271125
MmugDNA.38245.1.S1_at	1.90571	0.0373162
MmugDNA.27484.1.S1_at	1.90753	0.0484787
MmugDNA.12923.1.S1_at	1.90788	0.0127958
MmugDNA.8714.1.S1_at	1.90931	0.0272774
MmuSTS.873.1.S1_at	1.91049	0.005231
MmugDNA.35760.1.S1_at	1.91089	0.00394536
MmugDNA.23501.1.S1_at	1.9122	0.00435645
MmugDNA.30490.1.S1_at	1.91384	0.0153961
MmugDNA.12968.1.S1_at	1.91397	0.0055065
MmugDNA.34000.1.S1_at	1.91421	0.0286204
MmugDNA.19457.1.S1_at	1.91565	0.0184971
MmuSTS.4409.1.S1_at	1.91742	0.0453342
MmugDNA.15162.1.S1_at	1.91867	0.0110486
MmugDNA.17137.1.S1_at	1.91877	0.0466672
MmugDNA.17842.1.S1_at	1.91968	0.0140194
MmugDNA.4080.1.S1_at	1.92179	0.0187422
MmugDNA.42855.1.S1_at	1.92183	0.000257075
MmugDNA.38412.1.S1_at	1.92265	0.0336337
MmunewRS.808.1.S1_at	1.92385	0.012585
MmugDNA.2043.1.S1_at	1.92385	0.0244995
MmugDNA.23665.1.S1_at	1.92457	0.0305534
MmugDNA.16765.1.S1_at	1.92507	0.0312248
MmugDNA.42283.1.S1_at	1.92595	0.0297437
Mmu.1900.1.S1_s_at	1.92603	0.027059
MmuSTS.3435.1.S1_at	1.92626	0.00672136
MmugDNA.30837.1.S1_at	1.92706	0.0456826
MmugDNA.34837.1.S1_at	1.92778	0.0033369
MmugDNA.15356.1.S1_at	1.92901	0.0454131
MmugDNA.14272.1.S1_at	1.93044	0.0336116
MmugDNA.27816.1.S1_at	1.93255	0.0097928
MmugDNA.7044.1.S1_at	1.93337	0.0153288
MmuSTS.2189.1.S1_at	1.93434	0.0138021
MmugDNA.18794.1.S1_at	1.93586	0.0490229
MmugDNA.6436.1.S1_at	1.93714	0.0170493
MmuSTS.257.1.S1_at	1.93803	0.0497724
Mmu.10608.1.S1_x_at	1.93828	0.0296999
MmugDNA.27702.1.S1_at	1.93937	0.0484626
MmugDNA.19167.1.S1_at	1.94016	0.0256371
MmugDNA.16420.1.S1_at	1.9404	0.0382406
MmuSTS.2029.1.S1_at	1.94143	0.0311786
MmugDNA.9546.1.S1_s_at	1.94155	0.0275923
Mmu.10905.1.S1_at	1.94181	0.0440589
MmugDNA.33111.1.S1_at	1.9439	0.0317034
MmugDNA.11618.1.S1_at	1.94407	0.0204149
MmugDNA.7264.1.S1_at	1.9444	0.010202
MmugDNA.19141.1.S1_at	1.94549	0.0128323
MmugDNA.16426.1.S1_at	1.94604	0.0161531
MmugDNA.28959.1.S1_s_at	1.94622	0.0415659
MmugDNA.10122.1.S1_at	1.94718	0.0357407
MmugDNA.22863.1.S1_s_at	1.94744	0.0220362
MmunewRS.78.1.S1_at	1.94777	0.00575113
MmuSTS.4691.1.S1_at	1.94848	0.0224005
Mmu.258.1.S1_s_at	1.94873	0.0374189
MmuSTS.1942.1.S1_at	1.94931	0.0298114
MmugDNA.40207.1.S1_s_at	1.94957	0.0204116
MmugDNA.31722.1.S1_s_at	1.95028	0.0284734
MmugDNA.13787.1.S1_at	1.95058	0.0319736
MmugDNA.22330.1.S1_s_at	1.95088	0.0278276
MmugDNA.40742.1.S1_at	1.95199	0.0258873
MmugDNA.29877.1.S1_at	1.95413	0.0311374
MmugDNA.2305.1.S1_at	1.95586	0.0192706
MmugDNA.7062.1.S1_at	1.9561	0.0398527
MmugDNA.14759.1.S1_s_at	1.95791	0.0297603
MmugDNA.33125.1.S1_s_at	1.95995	0.00982276
MmugDNA.9526.1.S1_at	1.96005	0.00278628
MmunewRS.1007.1.S1_at	1.96032	0.0142007
MmugDNA.28942.1.S1_at	1.96037	0.00391341
MmugDNA.31429.1.S1_at	1.96146	0.0174696
MmugDNA.32172.1.S1_at	1.96163	0.0201139
MmugDNA.1628.1.S1_at	1.9621	0.0334648
MmugDNA.34797.1.S1_at	1.96344	0.0254123
MmugDNA.20126.1.S1_at	1.96357	0.0381661
MmugDNA.22988.1.S1_s_at	1.96415	0.0265866
MmugDNA.6250.1.S1_at	1.96435	0.044684
MmugDNA.15302.1.S1_s_at	1.96479	0.0421176
MmugDNA.27296.1.S1_at	1.9652	0.0472389
MmugDNA.33823.1.S1_s_at	1.96613	0.0345129
MmugDNA.30188.1.S1_at	1.96829	0.0251543
MmugDNA.9670.1.S1_at	1.96883	0.0217729
MmuSTS.2276.1.S1_x_at	1.96947	0.0163817
MmugDNA.17802.1.S1_s_at	1.96999	0.0277738
MmugDNA.5327.1.S1_at	1.96999	0.0303227
MmugDNA.6793.1.S1_at	1.97028	0.0265383
MmuSTS.417.1.S1_at	1.97072	0.0320899
MmugDNA.34775.1.S1_s_at	1.97156	0.0435018
MmugDNA.3661.1.S1_at	1.97256	0.0305972
MmugDNA.28060.1.S1_s_at	1.97292	0.0212656
MmugDNA.1518.1.S1_at	1.97738	0.0442508
MmugDNA.16488.1.S1_at	1.97831	0.0408835
MmugDNA.36905.1.S1_at	1.97849	0.0470131
MmugDNA.38929.1.S1_at	1.9809	0.0215865
MmugDNA.2125.1.S1_s_at	1.98118	0.0436416
MmugDNA.42254.1.S1_at	1.98178	0.0346629
MmugDNA.4011.1.S1_at	1.98188	0.00957144
MmugDNA.16024.1.S1_at	1.9845	0.0253339
MmugDNA.27835.1.S1_at	1.9845	0.0467506
MmuSTS.2993.1.S1_at	1.98511	0.0214237
MmugDNA.9337.1.S1_at	1.98521	0.0229751
MmugDNA.33563.1.S1_s_at	1.98526	0.00511701
MmugDNA.15094.1.S1_at	1.98597	0.00953404
MmugDNA.20958.1.S1_at	1.9867	0.0208617
MmugDNA.32064.1.S1_at	1.99175	0.0413292
MmugDNA.12956.1.S1_at	1.99209	0.0460865
MmugDNA.10584.1.S1_s_at	1.99255	0.0343609
Mmu.7469.1.S1_at	1.9966	0.0205699
MmuSTS.2324.1.S1_at	1.99676	0.0140824
MmuSTS.2276.1.S1_at	1.99781	0.0221818
MmugDNA.38287.1.S1_x_at	1.99845	0.00656485
MmugDNA.20430.1.S1_at	2.00008	0.0232173
MmugDNA.23711.1.S1_at	2.00218	0.00551292
MmugDNA.43463.1.S1_x_at	2.00224	0.00717387
MmunewRS.990.1.S1_at	2.00434	0.0453222
MmugDNA.37451.1.S1_at	2.00453	0.0219402
MmuSTS.3591.1.S1_s_at	2.00581	0.0147747
MmugDNA.32984.1.S1_s_at	2.00602	0.0126072
MmugDNA.17534.1.S1_s_at	2.00612	0.0440558
MmugDNA.35458.1.S1_s_at	2.00625	0.00959065
MmugDNA.8844.1.S1_at	2.00783	0.0112471
MmugDNA.27325.1.S1_at	2.01223	0.00171376
MmugDNA.26229.1.S1_at	2.01249	0.0224995
MmunewRS.314.1.S1_s_at	2.01469	0.0263327
MmugDNA.37923.1.S1_at	2.0148	0.0130105
MmugDNA.22346.1.S1_at	2.01496	0.0423241
MmugDNA.37408.1.S1_at	2.01499	0.00274151
MmugDNA.37564.1.S1_at	2.01528	0.0323333
MmunewRS.352.1.S1_at	2.01688	0.00398848
MmugDNA.24837.1.S1_s_at	2.0171	0.0158289
MmuSTS.3318.1.S1_at	2.01736	0.0381723
MmuSTS.960.1.S1_at	2.01769	0.00660411
MmugDNA.8138.1.S1_at	2.0183	0.0426256
MmugDNA.20478.1.S1_s_at	2.01937	0.0174096
MmugDNA.7616.1.S1_x_at	2.02032	0.00192499
MmuSTS.4690.1.S1_at	2.0214	0.0496748
MmugDNA.3049.1.S1_at	2.02179	0.0427496
MmugDNA.32273.1.S1_at	2.02185	0.0481136
MmugDNA.31627.1.S1_at	2.02253	0.0290871
MmugDNA.40675.1.S1_at	2.02385	0.0277256
MmugDNA.33467.1.S1_at	2.0241	0.0403034
Mmu.11074.1.S1_at	2.02517	0.0125817
MmugDNA.25519.1.S1_at	2.02633	0.0105791
MmugDNA.26487.1.S1_at	2.02826	0.0208172
MmugDNA.31198.1.S1_at	2.0293	0.0345075
MmugDNA.2413.1.S1_at	2.03007	0.020661
MmugDNA.39022.1.S1_at	2.03251	0.0348437
MmugDNA.35209.1.S1_at	2.03662	0.0377896
Mmu.12027.2.S1_at	2.03744	0.0152109
MmugDNA.13951.1.S1_at	2.03845	0.0103852
MmugDNA.23108.1.S1_at	2.03932	0.00568571
MmugDNA.34040.1.S1_at	2.03979	0.00852991
MmugDNA.2399.1.S1_at	2.04063	0.0429356
MmugDNA.2727.1.S1_at	2.04091	0.046143
MmugDNA.17979.1.S1_at	2.04172	0.0131048
MmugDNA.31144.1.S1_at	2.04219	0.0135747
MmuSTS.996.1.S1_at	2.04274	0.00501601
MmunewRS.186.1.S1_at	2.04302	0.0108442
MmugDNA.18759.1.S1_at	2.04338	0.0226759
MmugDNA.33204.1.S1_at	2.04416	0.00608216
MmugDNA.11624.1.S1_at	2.0452	0.0402174
MmugDNA.31044.1.S1_at	2.04527	0.0127447
MmugDNA.1707.1.S1_at	2.04589	0.00439739
MmugDNA.8019.1.S1_at	2.0463	0.0134627
MmugDNA.32619.1.S1_at	2.04724	0.0471391
MmugDNA.8939.1.S1_at	2.04751	0.0492877
MmugDNA.38368.1.S1_at	2.04839	0.00932672
MmugDNA.8075.1.S1_at	2.05004	0.0164587
MmugDNA.17041.1.S1_at	2.05036	0.0192203
MmugDNA.19217.1.S1_at	2.0522	0.0348574
MmunewRS.588.1.S1_at	2.05264	0.0234841
MmugDNA.31059.1.S1_s_at	2.05394	0.0318749
MmugDNA.17469.1.S1_at	2.05457	0.0141249
MmugDNA.10432.1.S1_at	2.05723	0.0172753
MmugDNA.26763.1.S1_at	2.05868	0.0438278
MmugDNA.28982.1.S1_s_at	2.06085	0.0199262
MmugDNA.42521.1.S1_at	2.06595	0.0168177
MmugDNA.10798.1.S1_at	2.06629	0.0499195
MmugDNA.9648.1.S1_at	2.06782	0.00257089
MmugDNA.41110.1.S1_s_at	2.06904	0.0301339
MmugDNA.34975.1.S1_s_at	2.07018	0.0203092
MmugDNA.9193.1.S1_at	2.07059	0.0229782
MmugDNA.29332.1.S1_s_at	2.07109	0.016312
MmuMitochon.13.1.S1_at	2.07227	0.00252197
MmugDNA.10638.1.S1_at	2.07248	0.0422319
MmugDNA.14634.1.S1_at	2.07288	0.00100102
MmugDNA.25452.1.S1_at	2.07291	0.0426592
MmugDNA.1834.1.S1_at	2.07337	0.0220167
MmugDNA.15321.1.S1_at	2.07344	0.0377565
MmugDNA.3866.1.S1_s_at	2.07389	0.030102
MmugDNA.33849.1.S1_s_at	2.07419	0.0254109
MmugDNA.13201.1.S1_at	2.07558	0.0332004
MmuSTS.3192.1.S1_at	2.07737	0.0183857
MmuSTS.2755.1.S1_s_at	2.07813	0.0352333
MmugDNA.19965.1.S1_at	2.07911	0.0351595
MmugDNA.17067.1.S1_at	2.07918	0.0114306
MmugDNA.5148.1.S1_at	2.08079	0.019098
MmugDNA.42509.1.S1_at	2.08256	0.00801232
MmugDNA.35346.1.S1_s_at	2.08344	0.0324444
MmugDNA.35148.1.S1_at	2.08369	0.041774
MmugDNA.22932.1.S1_at	2.08393	0.0394242
MmugDNA.30056.1.S1_at	2.08407	0.0218256
MmuSTS.4685.1.S1_at	2.08435	0.0195658
MmugDNA.20825.1.S1_at	2.08469	0.0407085
MmugDNA.33473.1.S1_at	2.08534	0.0153037
MmugDNA.201.1.S1_s_at	2.08948	0.035868
MmugDNA.13930.1.S1_at	2.08992	0.0476875
MmugDNA.19725.1.S1_at	2.09049	0.0150743
MmugDNA.9969.1.S1_at	2.09146	0.0456424
MmugDNA.6024.1.S1_at	2.09157	0.00702112
MmugDNA.28149.1.S1_at	2.09345	0.0381578
MmugDNA.6182.1.S1_at	2.0943	0.0329929
MmugDNA.33274.1.S1_at	2.09517	0.0285491
MmugDNA.30422.1.S1_at	2.09557	0.0246512
MmugDNA.9644.1.S1_at	2.0957	0.0133727
MmugDNA.34386.1.S1_at	2.0968	0.00534758
MmuSTS.64.1.S1_at	2.09857	0.0107534
MmuSTS.1812.1.S1_at	2.09928	0.0175605
MmuSTS.4227.1.S1_at	2.09958	0.0121253
MmugDNA.31771.1.S1_at	2.1002	0.0430757
MmugDNA.21684.1.S1_at	2.10245	0.00626258
MmugDNA.19353.1.S1_at	2.10326	0.0365564
MmugDNA.8607.1.S1_at	2.10408	0.0029069
MmugDNA.2050.1.S1_at	2.10453	0.0300281
MmugDNA.42328.1.S1_at	2.10512	0.0460523
MmugDNA.36981.1.S1_at	2.10725	0.0345885
MmuSTS.1427.1.S1_at	2.11089	0.00681256
Mmu.6730.1.S1_at	2.11166	0.0452639
MmugDNA.28075.1.S1_at	2.11212	0.0468667
MmugDNA.30625.1.S1_at	2.11286	0.00767438
MmugDNA.327.1.S1_at	2.11648	0.0470124
MmugDNA.31181.1.S1_at	2.11711	0.0318676
MmugDNA.1253.1.S1_at	2.11965	0.0271458
MmugDNA.35607.1.S1_at	2.12317	0.0221601
MmugDNA.19779.1.S1_s_at	2.12326	0.0211191
MmuSTS.2328.1.S1_at	2.12429	0.00814934
MmugDNA.37358.1.S1_at	2.12491	0.0270252
MmugDNA.32875.1.S1_x_at	2.12598	0.0416678
MmugDNA.22343.1.S1_at	2.1273	0.0324168
MmugDNA.37237.1.S1_at	2.12823	0.0110483
MmugDNA.22156.1.S1_at	2.12913	0.00139865
MmugDNA.16599.1.S1_at	2.13029	0.00814101
MmugDNA.13151.1.S1_at	2.13032	0.0164345
MmugDNA.36678.1.S1_at	2.13323	0.0422061
MmuSTS.3732.1.S1_s_at	2.13338	0.00883267
MmugDNA.23504.1.S1_s_at	2.13354	0.0485415
MmugDNA.35697.1.S1_at	2.13505	0.0468577
MmugDNA.11846.1.S1_at	2.13583	0.000525576
MmugDNA.22780.1.S1_s_at	2.13807	0.047806
MmugDNA.27781.1.S1_at	2.13878	0.00873393
MmugDNA.21896.1.S1_at	2.14012	0.0420968
MmugDNA.23349.1.S1_at	2.14354	0.0273445
MmugDNA.29443.1.S1_at	2.14501	0.0311935
MmuSTS.3369.1.S1_at	2.14514	0.00851145
MmugDNA.37546.1.S1_at	2.14558	0.0343868
MmuSTS.2006.1.S1_at	2.14657	0.0173711
MmugDNA.33303.1.S1_at	2.14708	0.0380646
MmugDNA.9372.1.S1_at	2.14813	0.0406927
MmugDNA.4836.1.S1_s_at	2.14888	0.0430463
Mmu.12921.1.S1_at	2.14912	0.0461066
MmugDNA.25536.1.S1_at	2.14913	0.0207672
MmugDNA.17409.1.S1_s_at	2.14969	0.0446456
Mmu.7399.1.S1_at	2.15489	0.0139785
MmugDNA.23475.1.S1_s_at	2.15511	0.0306704
MmugDNA.14271.1.S1_at	2.15553	0.0389986
MmugDNA.37965.1.S1_at	2.15836	0.0335364
MmugDNA.24158.1.S1_at	2.15957	0.0316085
Mmu.12263.1.S1_at	2.1599	0.0480021
MmuSTS.4445.1.S1_at	2.16074	0.034997
MmugDNA.31643.1.S1_at	2.16195	0.000305659
MmugDNA.5438.1.S1_at	2.16312	0.0407358
MmugDNA.23446.1.S1_at	2.16357	0.0308222
MmugDNA.42754.1.S1_at	2.16524	0.0245048
MmugDNA.38835.1.S1_at	2.16549	0.043919
MmuSTS.1345.1.S1_at	2.16896	0.0180585
MmuSTS.3182.1.S1_s_at	2.16905	0.0490675
MmugDNA.1581.1.S1_at	2.17009	0.0222843
MmugDNA.43191.1.S1_at	2.1702	0.0350371
MmugDNA.34539.1.S1_s_at	2.17133	0.0419225
MmugDNA.5639.1.S1_s_at	2.17428	0.00991102
MmugDNA.32229.1.S1_at	2.17486	0.0311602
MmugDNA.19457.1.S1_s_at	2.17644	0.0310296
MmugDNA.11551.1.S1_at	2.17753	0.0487459
MmugDNA.16232.1.S1_at	2.18315	0.00286956
MmugDNA.887.1.S1_at	2.18404	0.0399741
MmugDNA.11618.1.S1_s_at	2.18571	0.0430374
MmugDNA.2262.1.S1_at	2.18686	0.0134811
MmugDNA.25868.1.S1_at	2.18708	0.0452647
MmuSTS.2066.1.S1_at	2.18881	0.0168803
MmugDNA.36405.1.S1_s_at	2.18887	0.0454824
MmugDNA.239.1.S1_at	2.18961	0.0422392
MmugDNA.3302.1.S1_at	2.18969	0.0455165
MmugDNA.39167.1.S1_at	2.1916	0.0371971
MmugDNA.3017.1.S1_at	2.19888	0.00158437
MmugDNA.37831.1.S1_at	2.20115	0.0437408
MmugDNA.35810.1.S1_at	2.20646	0.0234811
MmugDNA.41111.1.S1_at	2.2081	0.0006244
MmugDNA.15764.1.S1_at	2.20837	0.0163508
MmunewRS.650.1.S1_at	2.20917	0.040625
MmugDNA.13774.1.S1_at	2.2096	0.038136
MmugDNA.15219.1.S1_s_at	2.21011	0.0225613
MmugDNA.37773.1.S1_at	2.21039	0.0341862
MmugDNA.24116.1.S1_at	2.21083	0.042217
MmugDNA.28352.1.S1_at	2.21108	0.0416912
MmugDNA.1596.1.S1_at	2.21415	0.0103967
MmunewRS.760.1.S1_at	2.21536	0.0208653
MmugDNA.18637.1.S1_at	2.21538	0.0126629
MmugDNA.29833.1.S1_at	2.21821	0.0185196
MmuSTS.2371.1.S1_at	2.21903	0.0182103
MmugDNA.2541.1.S1_at	2.22433	0.0236432
MmugDNA.17370.1.S1_s_at	2.22459	0.0394605
MmugDNA.21919.1.S1_s_at	2.2251	0.0266168
MmugDNA.795.1.S1_at	2.23452	0.0468732
MmugDNA.35241.1.S1_at	2.23511	0.00880154
MmugDNA.13327.1.S1_at	2.23751	0.000404191
MmugDNA.13699.1.S1_at	2.23774	0.0417514
MmugDNA.29855.1.S1_at	2.238	0.048038
MmugDNA.21465.1.S1_at	2.23941	0.0247272
MmugDNA.20882.1.S1_at	2.24059	0.0275382
MmugDNA.27367.1.S1_x_at	2.24638	0.0462496
MmugDNA.23594.1.S1_at	2.24746	0.00322586
MmugDNA.40386.1.S1_at	2.2476	0.0118014
MmugDNA.41188.1.S1_at	2.24781	0.0163753
MmugDNA.9750.1.S1_s_at	2.25309	0.0383935
MmuSTS.961.1.S1_at	2.25316	0.0276508
MmugDNA.21944.1.S1_at	2.25424	0.0171261
MmugDNA.14345.1.S1_at	2.26024	0.0183503
MmugDNA.11979.1.S1_at	2.26106	0.042047
MmugDNA.11379.1.S1_at	2.26147	0.0195149
MmugDNA.33563.1.S1_at	2.26156	0.0267749
MmuSTS.959.1.S1_at	2.26337	0.0248397
MmugDNA.38216.1.S1_at	2.26529	0.0396607
MmunewRS.348.1.S1_at	2.2664	0.011879
MmugDNA.18665.1.S1_at	2.26886	0.0117569
MmugDNA.12085.1.S1_at	2.27092	0.0267774
MmugDNA.28422.1.S1_at	2.2716	0.0279776
MmugDNA.36307.1.S1_at	2.27287	0.0386814
MmunewRS.951.1.S1_at	2.27643	0.0179203
MmugDNA.36078.1.S1_at	2.27936	0.019802
MmugDNA.20150.1.S1_at	2.28016	0.0239398
MmugDNA.23282.1.S1_s_at	2.28106	0.0234569
MmugDNA.40342.1.S1_at	2.28117	0.00163913
MmugDNA.38550.1.S1_s_at	2.28275	0.031872
MmugDNA.31904.1.S1_x_at	2.28458	0.005742
MmugDNA.2704.1.S1_at	2.28518	0.0362067
MmugDNA.4527.1.S1_at	2.28908	0.0051655
MmugDNA.23728.1.S1_at	2.28941	0.0424022
MmugDNA.31563.1.S1_at	2.28949	0.0302069
MmuSTS.4392.1.S1_at	2.29098	0.00670516
MmuSTS.1253.1.S1_at	2.29184	0.00519929
MmuSTS.3918.1.S1_at	2.29274	0.00303081
Mmu.11516.1.S1_at	2.29578	0.0313283
MmuSTS.246.1.S1_at	2.29597	0.00126641
MmugDNA.10607.1.S1_s_at	2.29712	0.0323231
MmugDNA.9057.1.S1_at	2.2997	0.0362413
MmugDNA.4014.1.S1_at	2.30236	0.0451809
MmugDNA.37404.1.S1_at	2.30276	0.0126825
MmugDNA.31301.1.S1_at	2.30295	0.0291319
MmugDNA.39136.1.S1_at	2.30337	0.0195169
MmugDNA.26747.1.S1_at	2.30387	0.036784
MmugDNA.13635.1.S1_s_at	2.30417	0.030446
MmugDNA.41375.1.S1_at	2.30645	0.0307971
MmuSTS.3506.1.S1_at	2.30685	0.0111548
MmuSTS.1770.1.S1_at	2.30753	0.0143203
MmugDNA.11287.1.S1_s_at	2.31049	0.0182055
MmugDNA.20979.1.S1_at	2.31689	0.0416284
MmugDNA.14685.1.S1_at	2.31811	0.0390152
MmugDNA.9293.1.S1_at	2.31831	0.0247094
MmugDNA.12930.1.S1_at	2.31836	0.0294713
MmugDNA.31792.1.S1_at	2.31881	0.0312043
MmugDNA.37142.1.S1_at	2.31975	0.0180274
MmugDNA.6768.1.S1_at	2.32016	0.0330371
MmuSTS.2251.1.S1_at	2.32068	0.0467055
MmugDNA.35117.1.S1_at	2.32232	0.0100816
Mmu.8081.1.S1_x_at	2.32502	0.0237476
Mmu.128.1.S1_at	2.33106	0.0153852
MmugDNA.23434.1.S1_at	2.33132	0.0282005
MmugDNA.6145.1.S1_s_at	2.33143	0.0454705
MmugDNA.37824.1.S1_at	2.33172	0.00511342
MmugDNA.24697.1.S1_at	2.33518	0.0357399
MmuSTS.1789.1.S1_at	2.33596	0.0329969
MmugDNA.42507.1.S1_at	2.33612	0.0259688
MmugDNA.6867.1.S1_at	2.34182	0.0375559
MmugDNA.25955.1.S1_at	2.34307	0.0439807
MmugDNA.2446.1.S1_at	2.34353	0.0166333
MmunewRS.240.1.S1_at	2.34404	0.0124248
MmuSTS.752.1.S1_at	2.34464	0.0367266
MmugDNA.11043.1.S1_s_at	2.34549	0.0203476
Mmu.5124.1.S1_at	2.34693	0.0175594
MmugDNA.22536.1.S1_at	2.34924	0.0373461
MmugDNA.39960.1.S1_at	2.35016	0.00669963
MmugDNA.5599.1.S1_s_at	2.35058	0.0282846
MmugDNA.25831.1.S1_at	2.35115	0.0231675
MmugDNA.25921.1.S1_at	2.35543	0.0497272
MmugDNA.13602.1.S1_at	2.36025	0.0284055
MmuSTS.2995.1.S1_at	2.36592	0.0449338
MmugDNA.34679.1.S1_at	2.37088	0.0454745
MmugDNA.23603.1.S1_at	2.37352	0.00959347
MmugDNA.35385.1.S1_at	2.37353	0.0412765
MmugDNA.41792.1.S1_at	2.37391	0.0236854
MmugDNA.8184.1.S1_s_at	2.3747	0.0105594
MmugDNA.26977.1.S1_at	2.38196	0.00946752
MmugDNA.15693.1.S1_at	2.38263	0.0440873
MmugDNA.30659.1.S1_at	2.38493	0.00857385
MmugDNA.13781.1.S1_at	2.3855	0.0147807
MmugDNA.33376.1.S1_s_at	2.38732	0.00408665
MmugDNA.39322.1.S1_s_at	2.38748	0.0397395
MmugDNA.29723.1.S1_at	2.39301	0.0301929
MmugDNA.274.1.S1_at	2.39745	0.0386815
MmuSTS.3266.1.S1_at	2.39805	0.00707985
MmugDNA.27800.1.S1_at	2.4036	0.0424117
MmugDNA.13810.1.S1_at	2.40393	0.0012715
MmunewRS.36.1.S1_at	2.40436	0.0455622
MmuSTS.2412.1.S1_at	2.40734	0.0458344
MmugDNA.33998.1.S1_at	2.40765	0.036372
MmugDNA.41293.1.S1_at	2.4108	0.043144
MmugDNA.28725.1.S1_at	2.4155	0.0187579
MmugDNA.7088.1.S1_at	2.41613	0.0285936
MmugDNA.4499.1.S1_at	2.41655	0.0097737
MmunewRS.1016.1.S1_at	2.41696	0.0167015
MmugDNA.25964.1.S1_at	2.4172	0.0489922
MmuSTS.167.1.S1_at	2.41738	0.0287584
MmugDNA.24731.1.S1_at	2.4182	0.0230056
MmugDNA.13821.1.S1_s_at	2.42156	0.0136336
MmugDNA.40492.1.S1_at	2.42265	0.0350468
MmugDNA.4092.1.S1_at	2.42308	0.032518
MmugDNA.34832.1.S1_at	2.426	0.0423261
MmugDNA.4553.1.S1_at	2.42633	0.0269431
MmugDNA.7413.1.S1_at	2.43426	0.0214898
MmunewRS.868.1.S1_at	2.43431	0.0116348
MmugDNA.24927.1.S1_at	2.44425	0.0169204
MmugDNA.14392.1.S1_at	2.44598	0.016041
MmugDNA.12743.1.S1_at	2.44627	0.00301943
MmugDNA.33839.1.S1_at	2.44936	0.0387867
MmugDNA.15181.1.S1_at	2.45293	0.0159142
MmugDNA.34052.1.S1_at	2.45307	0.00269913
MmugDNA.356.1.S1_s_at	2.45773	0.0132853
MmugDNA.29895.1.S1_at	2.46234	0.0131824
MmugDNA.38075.1.S1_at	2.47366	0.0237277
MmugDNA.40418.1.S1_at	2.47722	0.0307143
Mmu.12439.1.S1_s_at	2.4837	0.0235069
MmugDNA.24050.1.S1_at	2.48999	0.0262609
Mmu.12382.1.S1_s_at	2.49405	0.0405523
MmugDNA.40232.1.S1_at	2.49749	0.0405548
MmugDNA.944.1.S1_at	2.50052	0.011081
MmugDNA.15861.1.S1_s_at	2.50178	0.0235531
MmugDNA.23851.1.S1_at	2.50213	0.0387907
MmugDNA.40473.1.S1_at	2.50311	0.0190284
MmugDNA.5716.1.S1_at	2.50336	0.0373806
MmugDNA.30128.1.S1_s_at	2.50499	0.0146205
MmugDNA.22097.1.S1_at	2.50509	0.0191771
MmugDNA.30611.1.S1_at	2.50662	0.0118629
MmugDNA.14901.1.S1_at	2.51164	0.0348234
MmugDNA.37798.1.S1_at	2.51268	0.0498955
MmugDNA.23638.1.S1_at	2.51319	0.0267563
MmunewRS.977.1.S1_s_at	2.51447	0.0310924
MmugDNA.12441.1.S1_at	2.51588	0.010538
MmugDNA.25577.1.S1_at	2.52109	0.0100364
MmugDNA.20318.1.S1_at	2.52197	0.0330795
MmuSTS.1455.1.S1_at	2.52534	0.0398355
MmugDNA.42004.1.S1_at	2.52646	0.0360341
MmugDNA.30526.1.S1_at	2.52775	0.0367198
MmunewRS.307.1.S1_at	2.53805	0.0416935
MmugDNA.8169.1.S1_s_at	2.54751	0.0351334
MmugDNA.42600.1.S1_at	2.54985	0.0442756
MmugDNA.1900.1.S1_s_at	2.55352	0.0358646
MmugDNA.10577.1.S1_at	2.55407	0.043431
MmugDNA.17601.1.S1_at	2.5552	0.029799
MmugDNA.24422.1.S1_at	2.55557	0.0406318
MmugDNA.31296.1.S1_at	2.55658	0.0334352
MmugDNA.39884.1.S1_at	2.5582	0.0333047
Mmu.5257.1.S1_at	2.56087	0.0129033
MmugDNA.34939.1.S1_at	2.5624	0.0131774
MmugDNA.31287.1.S1_at	2.57354	0.0434255
Mmu.1249.1.S1_at	2.57788	0.0207513
MmugDNA.13450.1.S1_at	2.5782	0.0318916
MmugDNA.41388.1.S1_at	2.58206	0.0218251
MmugDNA.22371.1.S1_at	2.5886	0.0212336
MmugDNA.9219.1.S1_at	2.59352	0.0288708
Mmu.8081.1.S1_at	2.59999	0.0318375
MmuSTS.878.1.S1_s_at	2.60077	0.0377399
MmuSTS.1504.1.S1_at	2.61223	0.0167629
MmugDNA.14855.1.S1_at	2.61535	0.0312601
MmugDNA.3335.1.S1_s_at	2.61653	0.0281505
MmugDNA.33481.1.S1_x_at	2.6196	0.00139062
MmugDNA.34092.1.S1_at	2.6212	0.0392454
MmugDNA.18486.1.S1_s_at	2.62185	0.0216475
MmugDNA.12973.1.S1_at	2.63968	0.0138218
MmugDNA.41134.1.S1_at	2.64102	0.00633903
MmugDNA.27823.1.S1_at	2.64128	0.048336
MmugDNA.19484.1.S1_at	2.64284	0.0164966
MmuSTS.3403.1.S1_at	2.64393	0.0444381
MmugDNA.26382.1.S1_at	2.65551	0.0105178
MmuSTS.4228.1.S1_at	2.65786	0.0133703
MmugDNA.37920.1.S1_at	2.66005	0.0382168
MmugDNA.27134.1.S1_at	2.66052	0.00737318
MmugDNA.36491.1.S1_s_at	2.66156	0.00142871
MmugDNA.32151.1.S1_at	2.6618	0.0201394
MmugDNA.38865.1.S1_at	2.66586	0.0378481
MmugDNA.19418.1.S1_at	2.66834	0.00285707
MmugDNA.37854.1.S1_at	2.67165	0.00932038
MmugDNA.7233.1.S1_at	2.67761	0.01085
MmugDNA.6749.1.S1_at	2.69527	0.0205658
MmugDNA.6931.1.S1_at	2.70779	0.0255551
MmugDNA.10973.1.S1_at	2.70918	0.00858668
MmugDNA.9390.1.S1_at	2.71164	0.0270388
MmugDNA.41745.1.S1_at	2.71195	0.00867522
MmugDNA.8169.1.S1_at	2.71514	0.0291619
MmugDNA.42101.1.S1_at	2.74694	0.0472699
MmugDNA.3015.1.S1_at	2.74953	0.0328902
MmugDNA.10778.1.S1_at	2.75592	0.0165911
MmugDNA.18446.1.S1_s_at	2.75671	0.000312922
MmunewRS.671.1.S1_at	2.7593	0.0429154
MmugDNA.9517.1.S1_at	2.76695	0.000954822
MmugDNA.35589.1.S1_at	2.77199	0.0285805
MmugDNA.42729.1.S1_at	2.77719	0.0393513
MmugDNA.24002.1.S1_at	2.78091	0.0292096
MmugDNA.15292.1.S1_at	2.78124	0.0353497
MmugDNA.24973.1.S1_at	2.78156	0.0406542
MmugDNA.30971.1.S1_at	2.80699	0.00977876
MmugDNA.28032.1.S1_at	2.8079	0.000751366
MmuSTS.3453.1.S1_at	2.81782	0.0171282
MmuSTS.2290.1.S1_at	2.81879	0.0420638
MmugDNA.26326.1.S1_at	2.82347	0.0464678
MmugDNA.3887.1.S1_at	2.82668	0.0437655
MmugDNA.32477.1.S1_at	2.83026	0.0421033
MmugDNA.17537.1.S1_at	2.83773	0.0279214
MmugDNA.31034.1.S1_at	2.84665	0.0363035
MmugDNA.33607.1.S1_at	2.85776	0.0229217
MmuSTS.3615.1.S1_at	2.86181	0.0182796
MmunewRS.483.1.S1_at	2.88264	0.0341427
MmugDNA.7746.1.S1_s_at	2.90113	0.0230584
MmugDNA.42509.1.S1_s_at	2.90502	0.0142958
MmugDNA.32186.1.S1_at	2.90603	0.0158845
MmugDNA.32549.1.S1_x_at	2.93997	0.047897
MmuSTS.2340.1.S1_at	2.94742	0.0282494
MmugDNA.21143.1.S1_at	2.94801	0.0417092
Mmu.14737.1.S1_s_at	2.94928	0.0414886
MmugDNA.5295.1.S1_s_at	2.96713	0.0364081
MmugDNA.21518.1.S1_at	2.9697	0.0146778
MmugDNA.8106.1.S1_at	2.97179	0.0109888
MmugDNA.15523.1.S1_at	2.98394	0.0185735
MmugDNA.13559.1.S1_at	2.99374	0.0117422
MmugDNA.23843.1.S1_at	3.01408	0.0446451
MmunewRS.535.1.S1_at	3.01472	0.0390939
MmugDNA.18513.1.S1_s_at	3.02295	0.0251072
MmugDNA.4344.1.S1_at	3.07549	0.0489965
MmugDNA.32549.1.S1_s_at	3.12574	0.0331819
MmugDNA.19348.1.S1_at	3.12666	0.0178604
MmugDNA.41170.1.S1_at	3.14923	0.00657896
MmugDNA.25728.1.S1_at	3.15215	0.0199486
MmugDNA.25784.1.S1_at	3.18214	0.00239619
MmuSTS.1688.1.S1_at	3.19083	0.0474506
MmugDNA.5605.1.S1_at	3.19478	0.0152594
MmugDNA.794.1.S1_x_at	3.1996	0.0222185
MmugDNA.27785.1.S1_at	3.2021	0.00434287
MmugDNA.12567.1.S1_at	3.20378	0.0337013
MmugDNA.14585.1.S1_s_at	3.24019	0.0334919
MmugDNA.16404.1.S1_at	3.24676	0.041261
MmugDNA.20021.1.S1_s_at	3.30737	0.0345205
MmugDNA.31949.1.S1_at	3.30845	0.0156834
MmugDNA.19708.1.S1_s_at	3.34391	0.0460187
MmugDNA.20300.1.S1_at	3.42088	0.0112315
MmugDNA.19689.1.S1_s_at	3.42852	0.00794712
MmugDNA.11443.1.S1_at	3.42962	0.00361727
MmugDNA.28260.1.S1_at	3.54074	0.00641834
MmugDNA.5788.1.S1_s_at	3.55834	0.0286794
MmuSTS.944.1.S1_at	3.58769	0.04118
MmugDNA.19943.1.S1_s_at	3.74193	0.03634
MmugDNA.24931.1.S1_s_at	3.77049	0.0142458
MmugDNA.26589.1.S1_x_at	3.77696	0.00848258
Mmu.16547.1.S1_at	3.77804	0.00900358
MmugDNA.33353.1.S1_at	3.86692	0.0382539
MmugDNA.10639.1.S1_at	3.87024	0.0356225
MmugDNA.6273.1.S1_at	3.98648	0.038546
MmugDNA.19271.1.S1_s_at	4.05409	0.0194103
MmugDNA.18706.1.S1_at	4.38137	0.00731058
Mmu.1942.1.S1_at	4.39322	0.044444
MmugDNA.35559.1.S1_at	4.68134	0.0169346
Mmu.1942.1.S1_x_at	5.00801	0.019588
MmugDNA.19708.1.S1_at	5.0463	0.0114321
Mmu.3186.4.S1_x_at	5.11124	0.0273777
MmunewRS.661.1.S1_at	8.38114	0.0059354

## Sheet: Up 21d vs 90d PI
Probe	Fold Increase	P value
MmugDNA.25905.1.S1_at	1.7019	0.0376545
MmugDNA.16158.1.S1_at	1.70254	0.019326
MmugDNA.22341.1.S1_at	1.70284	0.0429585
MmugDNA.33341.1.S1_at	1.70309	0.0473825
MmugDNA.29950.1.S1_at	1.70315	0.0109357
MmugDNA.5120.1.S1_at	1.70451	0.0412999
MmugDNA.19129.1.S1_at	1.70679	0.0269391
MmugDNA.18584.1.S1_at	1.70853	0.00289631
MmugDNA.39497.1.S1_at	1.70905	0.00195133
MmugDNA.29863.1.S1_at	1.71443	0.0294037
MmugDNA.36566.1.S1_at	1.71569	0.0286618
MmugDNA.20606.1.S1_at	1.71818	0.0239088
MmugDNA.40429.1.S1_at	1.71879	0.0214726
MmugDNA.23698.1.S1_at	1.71915	0.0119439
MmugDNA.25765.1.S1_at	1.71934	0.0170618
MmuSTS.3785.1.S1_at	1.72134	0.0116466
MmuSTS.4205.1.S1_at	1.72195	0.0250644
MmugDNA.29853.1.S1_at	1.72401	0.0276815
MmuSTS.2205.1.S1_at	1.72468	0.0477448
MmugDNA.37035.1.S1_at	1.72643	0.0315889
MmugDNA.8711.1.S1_at	1.72646	0.0356764
MmugDNA.35053.1.S1_at	1.72788	0.025524
MmugDNA.12520.1.S1_at	1.7293	0.0349621
MmugDNA.14465.1.S1_at	1.7304	0.00602701
MmugDNA.35650.1.S1_s_at	1.73147	0.0352512
Mmu.15853.1.S1_s_at	1.73393	0.0150111
MmugDNA.14907.1.S1_at	1.73414	0.0301725
MmugDNA.8576.1.S1_at	1.73507	0.00634151
MmugDNA.1473.1.S1_s_at	1.73623	0.0338812
MmunewRS.20.1.S1_at	1.73822	0.0386495
MmugDNA.41221.1.S1_at	1.73835	0.0423014
MmugDNA.27385.1.S1_at	1.74007	0.0090468
MmugDNA.12621.1.S1_at	1.74369	0.0264998
MmugDNA.29090.1.S1_at	1.74377	0.0219326
MmugDNA.32355.1.S1_at	1.745	0.0256698
MmugDNA.14551.1.S1_at	1.74544	0.0366139
MmunewRS.776.1.S1_at	1.74955	0.0130544
MmugDNA.23171.1.S1_at	1.75285	0.00389249
MmugDNA.32905.1.S1_at	1.75354	0.0435225
MmugDNA.34368.1.S1_at	1.75477	0.00513978
MmuSTS.4343.1.S1_at	1.75536	0.0361436
MmugDNA.29989.1.S1_at	1.76061	0.0422592
MmugDNA.9860.1.S1_at	1.76096	0.0387
MmugDNA.39241.1.S1_at	1.76293	0.0331022
MmugDNA.25267.1.S1_at	1.76516	0.0182731
MmugDNA.20890.1.S1_at	1.76656	0.00823987
MmugDNA.20626.1.S1_at	1.76986	0.049565
MmuSTS.4200.1.S1_x_at	1.77084	0.0152384
MmugDNA.6894.1.S1_at	1.77179	0.014109
MmugDNA.21189.1.S1_at	1.77253	0.0464652
MmugDNA.13281.1.S1_at	1.77339	0.0448367
MmugDNA.22273.1.S1_at	1.77458	0.0265624
MmugDNA.2228.1.S1_at	1.77637	0.0191361
MmugDNA.9493.1.S1_at	1.77737	0.0123746
MmuSTS.599.1.S1_at	1.77863	0.0464533
MmugDNA.14390.1.S1_at	1.77941	0.0237186
MmugDNA.4467.1.S1_at	1.77954	0.0070823
MmugDNA.10677.1.S1_at	1.77972	0.0221342
MmugDNA.8462.1.S1_at	1.78113	0.043225
Mmu.245.1.S1_x_at	1.78274	0.032672
MmugDNA.17618.1.S1_at	1.78347	0.0486503
Mmu.5155.1.S1_s_at	1.7842	0.0235628
MmugDNA.5943.1.S1_s_at	1.78423	0.00995204
MmugDNA.13672.1.S1_at	1.78683	0.00495104
MmuSTS.4670.1.S1_s_at	1.7872	0.0249537
MmugDNA.16164.1.S1_at	1.78861	0.0435104
MmugDNA.34921.1.S1_at	1.78965	0.0187305
MmuSTS.4305.1.S1_at	1.79091	0.0178608
MmugDNA.15928.1.S1_at	1.79375	0.0332125
MmugDNA.31218.1.S1_at	1.79434	0.0370164
MmugDNA.40571.1.S1_at	1.79785	0.0121564
MmugDNA.14813.1.S1_at	1.79805	0.0337699
MmugDNA.31168.1.S1_at	1.7986	0.0296791
MmugDNA.34159.1.S1_at	1.80103	0.0111908
Mmu.16330.1.S1_at	1.80469	0.00842146
MmugDNA.4978.1.S1_at	1.80558	0.0191623
MmugDNA.21570.1.S1_at	1.80574	0.0180776
MmugDNA.39221.1.S1_at	1.80652	0.00219799
MmugDNA.38247.1.S1_s_at	1.80773	0.0378147
MmugDNA.24311.1.S1_at	1.80816	0.0144386
MmugDNA.6839.1.S1_at	1.80826	0.0299068
MmugDNA.37904.1.S1_at	1.81007	0.0403374
MmugDNA.25196.1.S1_x_at	1.81023	0.024445
MmugDNA.22821.1.S1_at	1.81304	0.0459725
Mmu.1396.1.S1_at	1.81307	0.00313364
MmugDNA.38840.1.S1_at	1.81424	0.0498706
MmuSTS.396.1.S1_at	1.81904	0.00553607
MmugDNA.3839.1.S1_at	1.82048	0.0137964
MmugDNA.12576.1.S1_at	1.82227	0.0249065
MmuSTS.3419.1.S1_at	1.8249	0.0429063
MmugDNA.24166.1.S1_at	1.82619	0.0436722
MmugDNA.41148.1.S1_at	1.82654	0.0397907
MmugDNA.2667.1.S1_at	1.83	0.0413137
MmugDNA.11486.1.S1_at	1.83585	0.0267662
MmugDNA.38861.1.S1_at	1.83632	0.0327043
MmugDNA.41396.1.S1_at	1.8382	0.00989211
MmugDNA.5101.1.S1_at	1.84015	0.0189274
MmugDNA.22119.1.S1_at	1.84041	0.0121431
MmugDNA.26160.1.S1_at	1.84172	0.0295395
MmugDNA.32124.1.S1_s_at	1.84195	0.0046973
MmugDNA.16706.1.S1_at	1.84324	0.0455347
MmugDNA.34631.1.S1_at	1.84488	0.0385483
MmuSTS.915.1.S1_at	1.8455	0.0498936
MmugDNA.30231.1.S1_at	1.84796	0.021186
MmugDNA.8521.1.S1_at	1.84812	0.0490793
MmugDNA.61.1.S1_at	1.8496	0.0264025
MmugDNA.9483.1.S1_at	1.85025	0.0424655
MmugDNA.26847.1.S1_at	1.85336	0.0220731
MmugDNA.6940.1.S1_at	1.85471	0.00630415
MmugDNA.20476.1.S1_at	1.85712	0.0178761
MmuSTS.926.1.S1_at	1.85735	0.0353691
MmugDNA.20765.1.S1_at	1.85898	0.0142091
MmugDNA.36201.1.S1_at	1.86793	0.00899586
MmuSTS.4136.1.S1_at	1.86836	0.00594782
MmugDNA.8236.1.S1_at	1.86891	0.0264481
MmugDNA.15523.1.S1_at	1.8712	0.00232788
MmugDNA.12800.1.S1_at	1.87294	0.0152836
MmugDNA.41095.1.S1_at	1.87373	0.0431385
MmugDNA.37337.1.S1_at	1.87472	0.0138858
MmugDNA.43046.1.S1_at	1.87533	0.0107506
MmugDNA.30795.1.S1_at	1.87565	0.0366065
MmugDNA.9195.1.S1_at	1.87659	0.0412279
MmugDNA.21420.1.S1_at	1.88164	0.0412688
MmugDNA.33208.1.S1_at	1.88354	0.0117975
MmugDNA.21082.1.S1_at	1.88407	0.0314916
MmugDNA.986.1.S1_at	1.88529	0.0216564
MmugDNA.10806.1.S1_at	1.8864	0.0231826
MmugDNA.40093.1.S1_at	1.88663	0.0471783
MmugDNA.6810.1.S1_at	1.88762	0.036741
MmugDNA.26001.1.S1_at	1.88794	0.0244502
Mmu.15723.1.S1_s_at	1.8884	0.0482399
MmugDNA.26853.1.S1_at	1.88951	0.0113179
MmugDNA.6130.1.S1_at	1.89015	0.0322983
Mmu.1351.1.S1_at	1.89241	0.0249665
MmugDNA.22021.1.S1_at	1.89596	0.0231058
MmugDNA.20631.1.S1_at	1.89764	0.00620846
MmuSTS.2959.1.S1_at	1.89947	0.00200415
MmugDNA.11785.1.S1_at	1.89953	0.0116235
MmuSTS.3737.1.S1_at	1.89982	0.046606
NC-001798.CDS26.S1_at	1.90035	0.00783126
MmugDNA.6877.1.S1_at	1.90186	0.0188703
MmugDNA.41190.1.S1_at	1.90208	0.014767
MmugDNA.2472.1.S1_at	1.9057	0.00420581
MmugDNA.23928.1.S1_at	1.90702	0.040858
MmugDNA.12793.1.S1_at	1.90764	0.0167945
MmugDNA.341.1.S1_at	1.90863	0.042317
MmugDNA.34255.1.S1_at	1.90933	0.0364122
MmugDNA.26706.1.S1_at	1.91102	0.0343659
MmugDNA.41125.1.S1_at	1.91182	0.0233332
MmugDNA.40672.1.S1_at	1.913	0.020592
MmugDNA.15164.1.S1_s_at	1.91308	0.013669
MmugDNA.21276.1.S1_at	1.9142	0.0370494
MmugDNA.2376.1.S1_at	1.91574	0.0499627
MmugDNA.42350.1.S1_at	1.91746	0.0497841
MmugDNA.35661.1.S1_at	1.91776	0.00608336
MmuSTS.4540.1.S1_at	1.92048	0.0388314
MmugDNA.20886.1.S1_at	1.92313	0.0191986
MmugDNA.102.1.S1_at	1.92402	0.0487344
MmugDNA.35687.1.S1_at	1.92481	0.0170684
MmugDNA.39848.1.S1_at	1.92603	0.0276898
MmugDNA.37051.1.S1_at	1.92743	0.0375487
MmugDNA.22933.1.S1_at	1.92998	0.0256096
MmugDNA.42385.1.S1_at	1.9301	0.0238123
MmuSTS.2763.1.S1_at	1.93071	0.0444521
MmugDNA.43359.1.S1_at	1.9312	0.0187633
MmugDNA.5606.1.S1_at	1.93564	0.0486093
MmugDNA.20268.1.S1_at	1.93826	0.0482462
MmugDNA.34238.1.S1_at	1.93851	0.0320925
MmugDNA.2324.1.S1_at	1.93956	0.0119219
MmugDNA.23383.1.S1_at	1.94172	0.0133229
Mmu.9097.1.S1_at	1.94224	0.0160251
MmugDNA.14374.1.S1_at	1.94413	0.00878412
MmugDNA.37389.1.S1_x_at	1.94529	0.0255308
MmugDNA.20084.1.S1_at	1.94904	0.0355663
MmunewRS.509.1.S1_at	1.95152	0.0064773
MmugDNA.20353.1.S1_at	1.95184	0.0419065
MmugDNA.39362.1.S1_at	1.95425	0.0317759
MmugDNA.11010.1.S1_at	1.95595	0.00860735
MmugDNA.19002.1.S1_at	1.95913	0.0416645
MmuSTS.3774.1.S1_at	1.96205	0.0409843
MmugDNA.34312.1.S1_at	1.96233	0.0102584
MmugDNA.17243.1.S1_at	1.96362	0.0380051
MmugDNA.31631.1.S1_s_at	1.96551	0.0439603
MmugDNA.24381.1.S1_at	1.96915	0.00652189
MmugDNA.8238.1.S1_at	1.97078	0.00601522
MmugDNA.4835.1.S1_at	1.97106	0.00270271
MmugDNA.22141.1.S1_at	1.97204	0.0107506
MmuSTS.2772.1.S1_at	1.97299	0.0405751
MmugDNA.6708.1.S1_at	1.97303	0.0129623
MmugDNA.40704.1.S1_at	1.97382	0.0141366
MmugDNA.39778.1.S1_at	1.9748	0.0311028
MmugDNA.38707.1.S1_at	1.97573	0.019393
MmugDNA.18091.1.S1_at	1.97624	0.00103129
MmugDNA.4761.1.S1_at	1.97729	0.0354204
MmugDNA.11266.1.S1_s_at	1.98055	0.0471657
MmugDNA.12531.1.S1_at	1.98352	0.0170757
MmunewRS.38.1.S1_at	1.98434	0.043085
MmugDNA.20110.1.S1_at	1.98478	0.00205765
MmugDNA.32133.1.S1_at	1.98541	0.0430658
MmugDNA.7004.1.S1_at	1.98644	0.0212658
MmugDNA.7048.1.S1_s_at	1.98666	0.0388245
MmugDNA.18009.1.S1_at	1.98804	0.016794
MmugDNA.12281.1.S1_at	1.98914	0.0407
MmugDNA.30408.1.S1_at	1.98916	0.0451082
MmugDNA.7255.1.S1_at	1.99072	0.0127133
MmugDNA.13433.1.S1_at	1.99194	0.0411283
MmuSTS.3739.1.S1_at	1.99244	0.0496304
MmugDNA.29456.1.S1_at	1.99363	0.00844955
MmugDNA.14883.1.S1_s_at	1.99381	0.0323886
MmugDNA.33989.1.S1_at	1.99432	0.0357848
MmugDNA.25334.1.S1_at	1.99467	0.0230249
MmuSTS.1015.1.S1_s_at	1.99516	0.0396632
MmugDNA.11999.1.S1_at	1.99707	0.0242703
MmuSTS.4165.1.S1_at	1.99934	0.00990121
MmugDNA.28058.1.S1_at	1.99992	0.0297468
MmugDNA.19758.1.S1_at	2.00975	0.00215824
MmugDNA.12838.1.S1_at	2.00994	0.00527232
MmugDNA.12364.1.S1_at	2.01065	0.0193328
MmugDNA.20106.1.S1_at	2.01728	0.0285661
MmugDNA.3676.1.S1_at	2.02276	0.00183406
MmugDNA.33245.1.S1_at	2.02497	0.0207217
MmuSTS.825.1.S1_at	2.02554	0.042723
MmugDNA.10164.1.S1_at	2.02655	0.0283746
MmugDNA.3040.1.S1_at	2.02835	0.0435065
MmugDNA.9585.1.S1_at	2.02881	0.00892575
MmugDNA.136.1.S1_at	2.03013	0.0448964
MmugDNA.22222.1.S1_at	2.03232	0.0463976
MmugDNA.32972.1.S1_at	2.034	0.00845669
MmugDNA.3635.1.S1_at	2.03591	0.0336186
MmugDNA.22111.1.S1_at	2.03813	0.0202971
MmugDNA.28235.1.S1_s_at	2.04045	0.0468641
MmugDNA.30953.1.S1_at	2.04082	0.0230807
MmugDNA.30330.1.S1_at	2.04149	0.0248111
Mmu.14152.1.S1_at	2.04229	0.0160347
MmugDNA.35492.1.S1_at	2.04405	0.0235479
MmugDNA.32059.1.S1_at	2.04526	0.0301657
MmugDNA.12780.1.S1_at	2.0476	0.041177
MmugDNA.17925.1.S1_at	2.04873	0.00756789
MmugDNA.11399.1.S1_at	2.04897	0.0088845
MmugDNA.17983.1.S1_at	2.04913	0.0213392
MmugDNA.3259.1.S1_at	2.04942	0.00579828
MmugDNA.16926.1.S1_at	2.04984	0.0189508
MmugDNA.43018.1.S1_at	2.05012	0.0438519
MmugDNA.6148.1.S1_at	2.05043	0.04817
MmugDNA.19666.1.S1_at	2.0534	0.0323629
MmugDNA.33427.1.S1_at	2.05444	0.0345204
MmugDNA.24736.1.S1_s_at	2.05462	0.036255
MmugDNA.3510.1.S1_at	2.05514	0.0326778
MmugDNA.32336.1.S1_at	2.05547	0.0467951
MmugDNA.8405.1.S1_at	2.05701	0.0218148
MmugDNA.5223.1.S1_at	2.05703	0.0106191
MmuSTS.3846.1.S1_at	2.05706	0.0220966
MmugDNA.33444.1.S1_at	2.05774	0.0229015
MmugDNA.8483.1.S1_at	2.05843	0.00808379
MmugDNA.10565.1.S1_at	2.06005	0.009712
MmugDNA.23285.1.S1_at	2.06127	0.0264174
MmugDNA.3081.1.S1_at	2.06454	0.0410489
MmugDNA.8809.1.S1_at	2.06886	0.0132481
MmugDNA.33858.1.S1_at	2.06948	0.0360512
MmugDNA.11457.1.S1_at	2.07338	0.0437864
MmugDNA.13400.1.S1_at	2.07487	0.0125821
MmugDNA.7243.1.S1_at	2.07931	0.00949009
MmugDNA.26050.1.S1_s_at	2.0815	0.0429814
MmugDNA.39127.1.S1_at	2.08177	0.0420644
MmugDNA.34190.1.S1_at	2.08398	0.0471757
MmugDNA.25129.1.S1_at	2.08403	0.0333952
MmugDNA.7942.1.S1_at	2.08414	0.0303517
MmuSTS.3552.1.S1_x_at	2.08503	0.0449611
MmugDNA.36129.1.S1_at	2.08544	0.0376335
MmugDNA.12146.1.S1_at	2.08629	0.018398
MmugDNA.5971.1.S1_at	2.0921	0.0201049
MmuSTS.1772.1.S1_s_at	2.09347	0.0386844
MmugDNA.3124.1.S1_at	2.09507	0.0132761
MmugDNA.21605.1.S1_at	2.09577	0.0322978
MmugDNA.8738.1.S1_at	2.09629	0.0121687
MmugDNA.5690.1.S1_at	2.09932	0.0155307
MmugDNA.14698.1.S1_at	2.10361	0.0331527
MmugDNA.3499.1.S1_at	2.106	0.026092
MmugDNA.32134.1.S1_at	2.10613	0.0336351
MmugDNA.43354.1.S1_at	2.10847	0.0374313
MmugDNA.31000.1.S1_at	2.11244	0.0351656
MmugDNA.14337.1.S1_at	2.11529	0.022555
MmugDNA.42468.1.S1_at	2.11631	0.0171093
MmuSTS.1082.1.S1_at	2.11651	0.0312434
MmugDNA.40647.1.S1_at	2.1168	0.01151
MmugDNA.29593.1.S1_at	2.11692	0.0320932
MmugDNA.5465.1.S1_at	2.11771	0.0489654
MmugDNA.13520.1.S1_at	2.12017	0.0458703
MmugDNA.25966.1.S1_at	2.1226	0.0355878
MmugDNA.3722.1.S1_at	2.12578	0.00399727
MmugDNA.1803.1.S1_at	2.12637	0.0312932
MmugDNA.12193.1.S1_at	2.12678	0.0106015
MmuSTS.3107.1.S1_at	2.12922	0.00709715
MmugDNA.19433.1.S1_at	2.13689	0.0401837
MmugDNA.20083.1.S1_at	2.13862	0.0405906
MmugDNA.15712.1.S1_x_at	2.13905	0.0209039
MmuSTS.1882.1.S1_s_at	2.14119	0.0484445
MmugDNA.25116.1.S1_at	2.14283	0.0229526
MmuSTS.2749.1.S1_at	2.14443	0.012649
MmugDNA.5808.1.S1_at	2.14531	0.0294129
MmugDNA.24849.1.S1_at	2.14693	0.00633597
MmugDNA.38622.1.S1_at	2.14756	0.0348467
MmugDNA.24878.1.S1_at	2.14776	0.0166637
MmuSTS.4197.1.S1_at	2.14905	0.00175139
MmugDNA.1960.1.S1_at	2.14972	0.00461934
MmugDNA.21148.1.S1_at	2.15125	0.0458931
NC-003401.CDS78.S1_at	2.15373	0.033492
MmugDNA.20597.1.S1_at	2.15466	0.0425542
MmuSTS.614.1.S1_at	2.15529	0.0422266
MmugDNA.25218.1.S1_at	2.1564	0.027603
MmugDNA.28883.1.S1_at	2.15857	0.0453094
MmugDNA.1773.1.S1_at	2.1595	0.010966
MmugDNA.20899.1.S1_at	2.15958	0.0392138
MmugDNA.21396.1.S1_at	2.16016	0.0432367
MmugDNA.23491.1.S1_at	2.1609	0.0108479
MmugDNA.30203.1.S1_at	2.1661	0.00418919
MmugDNA.10202.1.S1_at	2.1665	0.0263203
MmugDNA.16133.1.S1_at	2.16676	0.0290488
Mmu.10488.1.S1_at	2.16717	0.0136759
NC-006150.CDS143.S1_at	2.16849	0.0214567
MmugDNA.42847.1.S1_at	2.16921	0.0111093
MmugDNA.22543.1.S1_at	2.17041	0.0377079
MmugDNA.26266.1.S1_at	2.17146	0.0381958
MmugDNA.933.1.S1_at	2.17253	0.0136037
MmugDNA.13571.1.S1_at	2.17537	0.0380899
MmugDNA.19665.1.S1_at	2.17684	0.0162617
MmuSTS.1578.1.S1_at	2.17744	0.0360915
Mmu.1440.1.S1_at	2.18112	0.0414066
Mmu.5300.1.S1_at	2.18721	0.0438574
MmugDNA.21867.1.S1_at	2.18988	0.0337369
MmugDNA.37478.1.S1_at	2.19218	0.0243003
MmugDNA.32411.1.S1_at	2.1965	0.0322415
MmugDNA.20209.1.S1_at	2.19891	0.0209036
MmugDNA.11355.1.S1_at	2.19993	0.0218633
MmugDNA.40948.1.S1_at	2.20169	0.0157613
MmugDNA.27188.1.S1_at	2.20172	0.0165009
MmugDNA.27896.1.S1_at	2.20254	0.0160859
MmugDNA.22492.1.S1_at	2.20563	0.0291413
MmugDNA.3150.1.S1_s_at	2.20586	0.000212113
MmugDNA.18758.1.S1_at	2.20958	0.0354708
MmugDNA.34471.1.S1_at	2.20973	0.0446127
MmugDNA.8963.1.S1_at	2.20981	0.0296159
MmugDNA.42956.1.S1_at	2.21197	0.0133052
MmunewRS.87.1.S1_at	2.21421	0.0473618
MmugDNA.31595.1.S1_at	2.21478	0.0221215
MmugDNA.22544.1.S1_at	2.21645	0.00447094
MmugDNA.41303.1.S1_at	2.21828	0.0206337
MmugDNA.26642.1.S1_at	2.22151	0.0395944
MmugDNA.16098.1.S1_at	2.22284	0.0399263
MmugDNA.26307.1.S1_at	2.22512	0.0401319
MmugDNA.37979.1.S1_s_at	2.22587	0.0172357
MmugDNA.13990.1.S1_at	2.22835	0.00813566
MmugDNA.18606.1.S1_at	2.22877	0.0420319
MmugDNA.11479.1.S1_at	2.2292	0.038081
MmugDNA.6580.1.S1_at	2.22978	0.0139488
MmugDNA.26023.1.S1_at	2.23141	0.0158996
MmunewRS.107.1.S1_at	2.23168	0.00555551
MmugDNA.42523.1.S1_at	2.23205	0.0252431
MmugDNA.34911.1.S1_at	2.24306	0.022019
MmugDNA.19679.1.S1_at	2.24917	0.0393808
MmugDNA.2282.1.S1_at	2.25001	0.000143719
MmugDNA.6543.1.S1_at	2.25141	0.023645
MmugDNA.14731.1.S1_at	2.25252	0.0102286
MmugDNA.9833.1.S1_at	2.25409	0.0296213
MmugDNA.18222.1.S1_at	2.26118	0.0171385
MmugDNA.26950.1.S1_at	2.26318	0.000556423
MmugDNA.7085.1.S1_at	2.26343	0.0302122
MmugDNA.28190.1.S1_s_at	2.26384	0.0414237
MmuSTS.4604.1.S1_at	2.26499	0.00579941
MmugDNA.3832.1.S1_at	2.26767	0.041929
MmugDNA.39103.1.S1_at	2.27204	0.0173874
MmugDNA.25779.1.S1_at	2.27516	0.0230134
MmugDNA.33815.1.S1_at	2.27638	0.0336354
MmugDNA.12924.1.S1_at	2.28022	0.0117592
MmugDNA.19634.1.S1_at	2.2815	0.036899
MmuSTS.1168.1.S1_at	2.28572	0.0205164
MmugDNA.37479.1.S1_at	2.28581	0.0225108
MmugDNA.9913.1.S1_at	2.28728	0.0303275
MmunewRS.1009.1.S1_at	2.29435	0.0192589
MmugDNA.3868.1.S1_at	2.29673	0.00684742
Mmu.8574.2.S1_at	2.29688	0.00422695
MmugDNA.40538.1.S1_at	2.29868	0.00384831
MmugDNA.1657.1.S1_at	2.30088	0.00496781
Mmu.9975.10.S1_x_at	2.30218	0.0335335
MmuSTS.1691.1.S1_at	2.31172	0.0209113
MmugDNA.18778.1.S1_at	2.31246	0.0369361
MmuSTS.2467.1.S1_at	2.31575	0.0461654
MmugDNA.37721.1.S1_at	2.31609	0.0251487
MmugDNA.18949.1.S1_at	2.31667	0.00784433
MmugDNA.27180.1.S1_at	2.31804	0.0442801
MmuSTS.1296.1.S1_at	2.32472	0.0074402
MmugDNA.33844.1.S1_at	2.32896	0.0298516
MmugDNA.15707.1.S1_at	2.33031	0.0211246
MmugDNA.9953.1.S1_at	2.33116	0.00163814
MmugDNA.32762.1.S1_at	2.33175	0.00918774
MmugDNA.10293.1.S1_at	2.33205	0.00133392
MmugDNA.35445.1.S1_at	2.33256	0.0285728
MmugDNA.25882.1.S1_at	2.33629	0.00430451
MmugDNA.30982.1.S1_at	2.34001	0.036404
MmugDNA.4470.1.S1_at	2.34277	0.0280606
MmugDNA.37676.1.S1_at	2.3469	0.0305284
MmugDNA.21180.1.S1_at	2.34747	0.0376959
MmugDNA.12539.1.S1_s_at	2.34846	0.0176917
MmugDNA.37008.1.S1_at	2.34923	0.0263919
MmugDNA.2353.1.S1_at	2.35718	0.020722
MmugDNA.8976.1.S1_at	2.36398	0.0453968
MmugDNA.22599.1.S1_at	2.36669	0.0275858
MmuSTS.4625.1.S1_at	2.37074	0.00200979
MmugDNA.43090.1.S1_at	2.37108	0.0366964
MmugDNA.14339.1.S1_at	2.37224	0.0490043
MmugDNA.25239.1.S1_at	2.37437	0.00849349
MmugDNA.24491.1.S1_at	2.37541	0.0053018
MmugDNA.40393.1.S1_at	2.37679	0.00358452
MmugDNA.33746.1.S1_at	2.3774	0.000212664
MmugDNA.5511.1.S1_at	2.38234	0.0212877
MmugDNA.9012.1.S1_at	2.38254	0.0391575
MmugDNA.18070.1.S1_s_at	2.38349	0.0317549
MmugDNA.2590.1.S1_at	2.38969	0.0271974
MmugDNA.28198.1.S1_at	2.39008	0.0495421
MmuSTS.3605.1.S1_at	2.39246	0.0470799
MmuSTS.3154.1.S1_s_at	2.39319	0.00324079
MmugDNA.38255.1.S1_at	2.39775	0.00643707
MmugDNA.8894.1.S1_at	2.40466	0.00108484
MmugDNA.7354.1.S1_at	2.41513	0.00942945
MmugDNA.37662.1.S1_at	2.41688	0.0418328
MmugDNA.26602.1.S1_at	2.41722	0.0306147
MmugDNA.27601.1.S1_at	2.42263	0.0398723
MmugDNA.24289.1.S1_at	2.42627	0.0259029
NC-003401.CDS79.S1_at	2.43019	0.0112296
MmugDNA.24709.1.S1_at	2.43256	0.01416
MmugDNA.41054.1.S1_at	2.44047	0.004891
MmugDNA.4280.1.S1_at	2.44146	0.0158146
MmugDNA.17938.1.S1_at	2.4463	0.0313256
MmuSTS.139.1.S1_at	2.44746	0.0321175
MmugDNA.3155.1.S1_at	2.44791	0.0192321
MmugDNA.15854.1.S1_at	2.4563	0.00288936
MmugDNA.4435.1.S1_at	2.45776	0.0447738
MmugDNA.10115.1.S1_at	2.45812	0.0397917
MmugDNA.33218.1.S1_at	2.45845	0.000769618
MmugDNA.36643.1.S1_at	2.45998	0.0125507
MmugDNA.27798.1.S1_at	2.46122	0.019275
MmugDNA.12683.1.S1_at	2.46169	0.00161462
MmugDNA.7756.1.S1_at	2.46323	0.0387292
MmugDNA.15341.1.S1_at	2.46551	0.00838031
MmugDNA.8673.1.S1_at	2.46581	0.0158032
MmugDNA.2551.1.S1_at	2.46995	0.010687
MmugDNA.42006.1.S1_at	2.47231	0.0144567
MmugDNA.8716.1.S1_at	2.47814	0.0351641
MmugDNA.17864.1.S1_at	2.47873	0.0128188
MmugDNA.32285.1.S1_at	2.48041	0.0102448
MmugDNA.16025.1.S1_at	2.48084	0.0273276
MmuSTS.569.1.S1_at	2.48091	0.0315247
MmugDNA.8778.1.S1_at	2.48102	0.0430103
MmugDNA.18548.1.S1_at	2.48223	0.0218956
MmugDNA.6902.1.S1_at	2.48317	0.00184137
MmugDNA.1296.1.S1_at	2.48825	0.0299499
MmugDNA.17389.1.S1_at	2.49312	0.00230554
MmuSTS.4200.1.S1_at	2.49364	0.00388193
MmugDNA.41471.1.S1_at	2.49626	0.0321268
MmugDNA.33852.1.S1_at	2.50741	0.0195394
MmugDNA.16558.1.S1_at	2.5159	0.01818
MmugDNA.14561.1.S1_at	2.51972	0.00757579
MmugDNA.9777.1.S1_at	2.52076	0.0166495
MmugDNA.5394.1.S1_at	2.53017	0.0128071
MmugDNA.32962.1.S1_at	2.5384	0.0131531
MmugDNA.25332.1.S1_at	2.54535	0.0255336
MmugDNA.22196.1.S1_at	2.54544	0.0198218
MmugDNA.29805.1.S1_at	2.54625	0.0272721
MmuSTS.4027.1.S1_at	2.54975	0.0314318
MmuSTS.4243.1.S1_s_at	2.55031	0.0073973
MmugDNA.32075.1.S1_at	2.55345	0.0350275
MmugDNA.11060.1.S1_at	2.55495	0.0285845
MmugDNA.40400.1.S1_at	2.55686	0.0146756
MmugDNA.35915.1.S1_at	2.55691	0.0389246
MmugDNA.34243.1.S1_at	2.55854	0.002722
MmugDNA.10327.1.S1_at	2.56964	0.0199695
MmugDNA.5632.1.S1_at	2.57214	0.00275515
MmugDNA.11568.1.S1_at	2.57309	0.0389721
MmugDNA.35730.1.S1_at	2.57556	0.0164942
MmuSTS.292.1.S1_at	2.57693	0.00486652
MmugDNA.3688.1.S1_at	2.57715	0.0134335
MmuSTS.3099.1.S1_at	2.57848	0.0216497
MmuSTS.4042.1.S1_at	2.58156	0.0164813
MmugDNA.29751.1.S1_at	2.5888	0.00446295
MmugDNA.31885.1.S1_at	2.60135	0.0275746
MmugDNA.6105.1.S1_at	2.60237	0.0419445
MmugDNA.27242.1.S1_at	2.60508	0.00441098
MmuSTS.2654.1.S1_at	2.60721	0.0221427
MmuSTS.3665.1.S1_at	2.60931	0.012533
MmugDNA.28661.1.S1_at	2.61413	0.00924671
MmugDNA.38636.1.S1_at	2.6147	0.00481591
MmugDNA.23276.1.S1_at	2.61919	0.00254619
MmugDNA.39860.1.S1_at	2.62133	0.0262153
MmugDNA.23444.1.S1_at	2.62208	0.0149582
MmugDNA.27641.1.S1_at	2.62419	0.0229998
MmugDNA.16990.1.S1_at	2.62642	0.0441619
MmugDNA.16485.1.S1_at	2.63233	0.0335695
MmugDNA.28718.1.S1_at	2.63366	0.0394384
MmugDNA.12067.1.S1_at	2.63741	0.0205027
MmugDNA.33723.1.S1_at	2.64144	0.0441194
MmugDNA.2573.1.S1_at	2.64486	0.0266821
MmuSTS.4836.1.S1_at	2.64911	0.0400547
MmugDNA.20953.1.S1_at	2.65469	0.0389537
MmugDNA.28103.1.S1_at	2.66029	0.0347192
MmuSTS.19.1.S1_at	2.66601	0.0405323
MmugDNA.6823.1.S1_s_at	2.66818	0.0116322
MmugDNA.2179.1.S1_at	2.6713	0.0332208
MmugDNA.31645.1.S1_at	2.67386	0.0328721
MmugDNA.30292.1.S1_at	2.67744	0.0387618
MmugDNA.12211.1.S1_at	2.68531	0.0054258
MmugDNA.42763.1.S1_at	2.68725	0.0196118
MmugDNA.14489.1.S1_at	2.68859	0.0286388
MmugDNA.15007.1.S1_at	2.69231	0.0125277
MmugDNA.12276.1.S1_at	2.6986	0.0313759
MmugDNA.3262.1.S1_at	2.7011	0.0196543
MmugDNA.41698.1.S1_at	2.71158	0.0132455
MmugDNA.43094.1.S1_at	2.71292	0.0476115
MmugDNA.37509.1.S1_at	2.71817	0.00292286
MmugDNA.20922.1.S1_at	2.72132	0.0124178
MmugDNA.4560.1.S1_at	2.72185	0.00107893
Mmu.4098.1.S1_at	2.72456	0.0399421
MmugDNA.39565.1.S1_at	2.74161	0.0311296
MmugDNA.21539.1.S1_at	2.74379	0.0214809
MmugDNA.5997.1.S1_at	2.74557	0.00100708
MmugDNA.6389.1.S1_at	2.74679	0.0153486
MmugDNA.1267.1.S1_s_at	2.75014	0.000654283
MmugDNA.30058.1.S1_at	2.76257	0.0356038
MmugDNA.18350.1.S1_at	2.76631	0.00948941
MmugDNA.20650.1.S1_at	2.77131	0.0123793
MmugDNA.22052.1.S1_at	2.78001	0.0251561
MmugDNA.4102.1.S1_at	2.78737	0.0260585
MmugDNA.39036.1.S1_at	2.78826	0.0431585
MmugDNA.11631.1.S1_s_at	2.78936	0.0174342
Mmu.4194.1.S1_at	2.79524	0.0389647
MmuSTS.2604.1.S1_at	2.7994	0.0374791
MmugDNA.5476.1.S1_at	2.80182	0.0101097
MmugDNA.29588.1.S1_at	2.805	0.00251307
MmugDNA.38792.1.S1_at	2.80745	0.0286771
MmugDNA.19256.1.S1_s_at	2.81886	0.00170147
MmugDNA.33686.1.S1_s_at	2.81892	0.0181406
MmugDNA.23145.1.S1_at	2.82056	0.0296419
MmugDNA.32305.1.S1_at	2.82321	0.0228615
MmugDNA.7937.1.S1_at	2.82363	0.0127684
MmugDNA.4120.1.S1_at	2.82688	0.0243919
MmugDNA.22065.1.S1_at	2.83141	0.040334
MmugDNA.43169.1.S1_at	2.83164	0.00489683
MmugDNA.38780.1.S1_at	2.83436	0.0170667
MmugDNA.30786.1.S1_at	2.83917	0.00141794
MmugDNA.34489.1.S1_at	2.84117	0.024472
MmugDNA.31948.1.S1_at	2.846	0.00345746
MmugDNA.7078.1.S1_at	2.84791	0.0427859
MmugDNA.28051.1.S1_at	2.85636	0.00266512
Mmu.2196.1.A1_at	2.86625	0.00573183
MmugDNA.7905.1.S1_at	2.87094	0.00575808
MmugDNA.37577.1.S1_at	2.87301	0.0199838
MmugDNA.40413.1.S1_at	2.87627	0.0383887
MmugDNA.4354.1.S1_at	2.87919	0.0476562
MmugDNA.9704.1.S1_at	2.88245	0.00397894
MmuSTS.4222.1.S1_at	2.88848	0.0281584
MmugDNA.24580.1.S1_at	2.88958	0.0261562
MmugDNA.6874.1.S1_at	2.89038	0.00755127
MmugDNA.12929.1.S1_at	2.90515	0.0107732
MmugDNA.27037.1.S1_at	2.90993	0.0297767
MmugDNA.38349.1.S1_at	2.92151	0.0307648
MmuSTS.917.1.S1_at	2.92486	0.0434891
MmugDNA.42496.1.S1_at	2.926	0.000352386
MmugDNA.38698.1.S1_at	2.92639	0.0399782
MmugDNA.11157.1.S1_at	2.92933	0.00616378
MmugDNA.9511.1.S1_at	2.93405	0.0399279
MmuSTS.3954.1.S1_at	2.94073	0.0141679
MmugDNA.26927.1.S1_at	2.94128	0.0355264
MmugDNA.9095.1.S1_at	2.94798	0.0441384
MmugDNA.22521.1.S1_at	2.94811	0.02806
MmugDNA.15714.1.S1_at	2.95621	0.000712042
MmugDNA.30878.1.S1_at	2.96523	0.00266736
MmugDNA.31206.1.S1_at	2.97594	0.0257029
MmugDNA.27804.1.S1_at	2.97922	0.0197571
MmugDNA.43121.1.S1_at	2.98623	0.0357328
MmugDNA.18298.1.S1_at	2.98698	0.0158023
MmugDNA.26678.1.S1_at	2.99563	0.0106898
MmugDNA.43568.1.S1_at	3.00343	0.0165837
MmugDNA.26644.1.S1_at	3.00686	0.00564292
MmugDNA.29602.1.S1_at	3.01939	0.0448687
MmugDNA.41007.1.S1_at	3.02557	0.0470465
MmugDNA.3242.1.S1_at	3.0376	0.0203089
Mmu.2856.1.S1_at	3.03957	0.0104489
MmuSTS.3830.1.S1_at	3.04929	0.00729841
MmugDNA.37650.1.S1_at	3.05762	0.000212744
MmugDNA.18831.1.S1_at	3.06108	0.0361369
MmugDNA.21592.1.S1_at	3.07568	0.0182074
MmugDNA.20870.1.S1_at	3.08036	0.043099
MmugDNA.8581.1.S1_at	3.08784	0.0402039
MmuSTS.1085.1.S1_at	3.09008	0.0219777
MmugDNA.6564.1.S1_at	3.10299	0.0481558
MmugDNA.22124.1.S1_at	3.10374	0.0393163
MmugDNA.43314.1.S1_at	3.1138	0.0313009
MmugDNA.20166.1.S1_at	3.1142	0.0220189
MmugDNA.29059.1.S1_at	3.11545	0.0443339
MmugDNA.26533.1.S1_at	3.12289	0.00319629
MmuSTS.3373.1.S1_s_at	3.12332	0.0485324
MmugDNA.25433.1.S1_at	3.12611	0.0217062
MmugDNA.42885.1.S1_at	3.12715	0.0451693
MmuSTS.345.1.S1_at	3.14316	0.0417373
MmugDNA.33471.1.S1_at	3.1492	0.0125123
MmugDNA.37979.1.S1_at	3.14977	0.00661123
MmuSTS.884.1.S1_at	3.15745	0.0230911
MmugDNA.27617.1.S1_at	3.17379	0.0216327
MmugDNA.724.1.S1_at	3.17818	0.0431503
MmugDNA.23517.1.S1_at	3.18031	0.0199514
MmugDNA.11749.1.S1_at	3.20535	0.00994659
MmugDNA.26913.1.S1_at	3.21164	0.0432486
MmugDNA.6323.1.S1_at	3.22307	0.00983863
MmugDNA.5943.1.S1_at	3.22504	0.0220523
MmugDNA.6492.1.S1_at	3.23632	0.0318449
MmuSTS.3873.1.S1_at	3.23799	0.0466772
MmugDNA.10864.1.S1_at	3.24178	0.0341355
MmugDNA.26294.1.S1_at	3.24238	0.00344261
MmugDNA.16255.1.S1_at	3.24259	0.011534
MmugDNA.13403.1.S1_at	3.24666	0.00128598
MmugDNA.39609.1.S1_at	3.25233	0.0218616
MmugDNA.40875.1.S1_at	3.25256	0.0105695
MmugDNA.5611.1.S1_at	3.25624	0.0327308
MmugDNA.21667.1.S1_s_at	3.26399	0.0145386
MmugDNA.7409.1.S1_at	3.26606	0.0149721
MmugDNA.1699.1.S1_at	3.28818	0.0437707
MmugDNA.20407.1.S1_at	3.30401	0.0193542
MmugDNA.1140.1.S1_at	3.31406	0.0223609
MmugDNA.12158.1.S1_at	3.34172	0.0129443
MmugDNA.36067.1.S1_at	3.34358	0.0333329
MmugDNA.12888.1.S1_at	3.35846	0.0433407
MmuSTS.940.1.S1_at	3.36562	0.0274401
MmuSTS.3489.1.S1_at	3.38164	0.0420161
MmugDNA.16004.1.S1_at	3.39918	0.0228805
MmugDNA.40156.1.S1_at	3.39963	0.0223247
MmugDNA.25691.1.S1_at	3.40732	0.0154311
MmuSTS.1144.1.S1_at	3.41394	0.0238934
MmugDNA.38008.1.S1_at	3.44753	0.0393575
MmugDNA.9569.1.S1_at	3.45345	0.0182464
MmugDNA.20303.1.S1_at	3.45456	0.0261327
MmugDNA.3405.1.S1_at	3.47244	0.0403866
MmugDNA.7449.1.S1_at	3.47315	0.0496292
MmugDNA.29502.1.S1_at	3.49185	0.0479054
MmugDNA.2964.1.S1_at	3.50289	0.0317079
MmugDNA.27987.1.S1_at	3.50397	0.0398932
MmugDNA.858.1.S1_at	3.50565	0.0287308
MmugDNA.3529.1.S1_at	3.53025	0.0372748
MmugDNA.3094.1.S1_at	3.5316	0.0341845
MmugDNA.11591.1.S1_s_at	3.53527	0.0355669
MmugDNA.28497.1.S1_at	3.5384	0.0167936
MmugDNA.3343.1.S1_at	3.54069	0.0104291
MmugDNA.2611.1.S1_at	3.54122	0.0317959
MmugDNA.7580.1.S1_at	3.54153	0.0323123
MmugDNA.2569.1.S1_s_at	3.54348	0.0437613
MmugDNA.18070.1.S1_at	3.5768	0.0497757
MmuSTS.3418.1.S1_at	3.57996	0.0457365
MmunewRS.978.1.S1_at	3.60714	0.0256741
MmugDNA.8061.1.S1_at	3.63872	0.00481985
MmugDNA.1315.1.S1_at	3.64611	0.0480893
MmunewRS.524.1.S1_at	3.67001	0.0155606
MmuSTS.2400.1.S1_at	3.68377	0.00379468
MmugDNA.17376.1.S1_at	3.68568	0.0474835
MmuSTS.3138.1.S1_at	3.71285	0.015022
MmugDNA.30710.1.S1_at	3.71369	0.0441182
MmugDNA.7514.1.S1_at	3.7224	0.0456776
MmugDNA.1533.1.S1_at	3.74465	0.0479605
MmugDNA.8438.1.S1_at	3.76105	0.0111862
MmugDNA.10559.1.S1_at	3.76574	0.0228699
MmugDNA.18627.1.S1_at	3.76602	0.0469223
MmuSTS.3600.1.S1_at	3.7878	0.0445441
MmuSTS.2832.1.S1_at	3.80587	0.0093338
MmugDNA.27784.1.S1_at	3.82336	0.0241394
MmuSTS.4198.1.S1_at	3.83242	0.0110633
MmugDNA.4850.1.S1_at	3.84559	0.0466394
MmugDNA.18101.1.S1_at	3.86526	0.0328919
MmugDNA.3073.1.S1_at	3.87863	0.0325835
MmugDNA.2066.1.S1_at	3.89652	0.0093692
MmugDNA.12879.1.S1_at	3.90974	0.0024246
MmugDNA.1978.1.S1_at	3.91642	0.0460754
MmugDNA.3683.1.S1_at	3.93036	0.0409508
MmugDNA.41465.1.S1_at	3.93992	0.0471479
MmugDNA.11157.1.S1_s_at	3.9406	0.0022181
MmugDNA.19625.1.S1_at	3.95816	0.0133429
MmugDNA.13265.1.S1_at	3.96316	0.0386818
MmugDNA.16429.1.S1_at	3.97306	0.048442
MmuSTS.3375.1.S1_at	4.0121	0.0165478
MmuSTS.2961.1.S1_at	4.01447	0.0057004
MmugDNA.29686.1.S1_at	4.01469	0.0475814
MmuSTS.4091.1.S1_at	4.03485	0.0337496
MmuSTS.1523.1.S1_at	4.0748	0.0466711
MmugDNA.6561.1.S1_at	4.14495	0.0231662
MmugDNA.410.1.S1_s_at	4.15589	0.0240275
MmuSTS.1564.1.S1_at	4.16539	0.000666199
MmugDNA.1952.1.S1_at	4.17487	0.00662513
MmuSTS.3621.1.S1_at	4.18588	0.0366707
MmuSTS.1895.1.S1_at	4.25008	0.00508218
MmuSTS.3420.1.S1_at	4.28222	0.0146831
MmugDNA.39811.1.S1_at	4.2936	0.0207303
MmugDNA.6272.1.S1_at	4.34965	0.0428939
MmuSTS.4000.1.S1_at	4.35262	0.0287257
MmugDNA.20784.1.S1_at	4.36981	0.00701682
MmuSTS.103.1.S1_at	4.38138	0.0491767
MmugDNA.43065.1.S1_at	4.43722	0.00433958
MmugDNA.37109.1.S1_at	4.44323	0.0093078
Mmu.2053.1.S1_s_at	4.45732	0.0490638
MmugDNA.22917.1.S1_at	4.49292	0.0159846
MmugDNA.42085.1.S1_at	4.49833	0.0382254
MmugDNA.36447.1.S1_at	4.49906	0.0172315
MmuSTS.3742.1.S1_at	4.53876	0.0492558
MmugDNA.29064.1.S1_at	4.54448	0.0429566
MmugDNA.13.1.S1_at	4.55637	0.0127028
MmuSTS.1042.1.S1_at	4.62183	0.00688384
MmugDNA.29044.1.S1_at	4.66389	0.0346812
MmugDNA.23000.1.S1_at	4.68391	0.00414723
MmugDNA.16448.1.S1_at	4.69898	0.043208
MmuSTS.3808.1.S1_at	4.78627	0.0311589
MmugDNA.26260.1.S1_at	4.96164	0.0445096
MmugDNA.33787.1.S1_at	4.96766	0.0135011
MmugDNA.40144.1.S1_at	4.97071	0.0420257
MmugDNA.16101.1.S1_at	4.99532	0.018945
MmugDNA.11966.1.S1_at	5.04992	0.0178838
MmugDNA.19115.1.S1_at	5.08808	0.0468657
MmugDNA.7360.1.S1_at	5.09127	0.0167813
MmugDNA.2200.1.S1_s_at	5.11931	0.000398348
MmugDNA.39902.1.S1_at	5.13284	0.00972764
MmugDNA.17553.1.S1_at	5.14719	0.00754552
MmuSTS.4093.1.S1_at	5.18181	0.00146073
MmugDNA.10542.1.S1_at	5.2226	0.0144487
MmugDNA.34936.1.S1_at	5.26189	0.046482
MmugDNA.35938.1.S1_at	5.39457	0.00570312
MmugDNA.9314.1.S1_at	5.54949	0.0263034
MmugDNA.35703.1.S1_at	5.66053	0.0333295
MmuSTS.2541.1.S1_at	5.66098	0.0304369
MmuSTS.3569.1.S1_at	5.70377	0.0257935
MmugDNA.1879.1.S1_s_at	5.86073	0.043121
MmugDNA.25807.1.S1_at	5.92839	0.0305881
MmugDNA.23024.1.S1_at	6.42214	0.00432078
MmugDNA.38219.1.S1_at	6.53386	0.0296833
MmugDNA.9879.1.S1_at	6.98353	0.0302749
MmugDNA.43374.1.S1_at	7.0191	0.0140534
MmugDNA.10128.1.S1_at	7.81217	0.0455496
MmugDNA.21025.1.S1_at	8.45057	0.0204839
MmugDNA.20699.1.S1_at	8.49296	0.0486916
MmugDNA.4948.1.S1_at	8.49396	0.0466861
MmugDNA.1567.1.S1_at	8.6445	0.0288382
